# Supplementary material for: Intronic ATTTC repeat expansions in STARD7 in familial adult myoclonic epilepsy linked to chromosome 2
Source: PubMed Central journal article supplement (PMC6820779; doi:10.1038/s41467-019-12671-y), 2019-10-29
Supplement: 41467_2019_12671_MOESM1_ESM.pdf [file 41467_2019_12671_MOESM1_ESM.pdf]

**Supplementary Information**

**Intronic ATTTC repeat expansions in *STARD7* in familial adult myoclonic epilepsy  
linked to chromosome 2**

Corbett, *et al.*

## Supplementary Figures

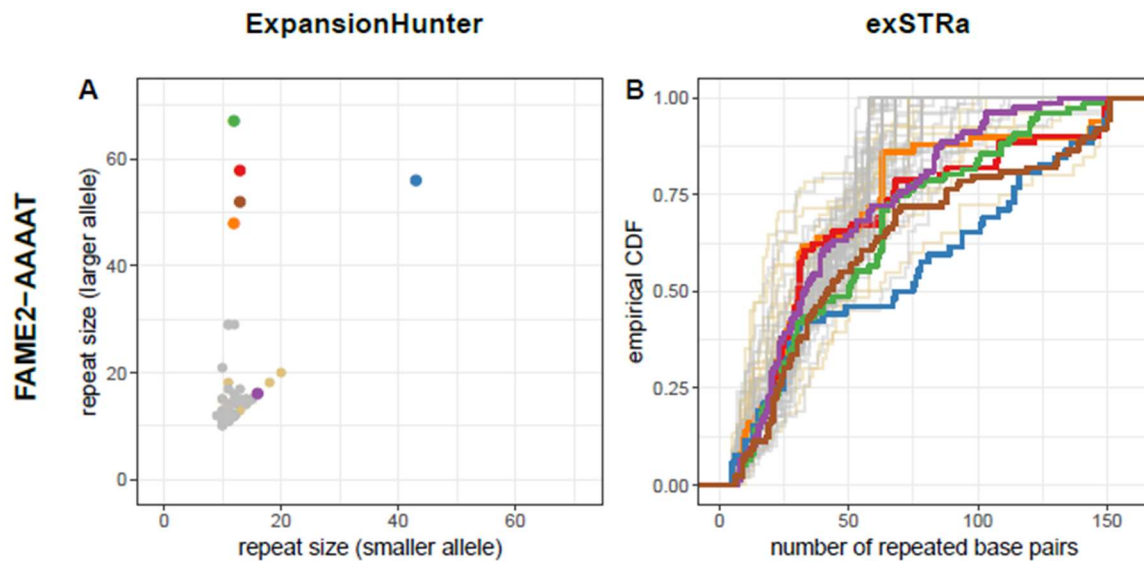

### Supplementary Figure. 1. AAAAT repeat sizes predicted by ExpansionHunter and exSTRa.

Estimated sizes of the AAAAT repeats in two affected individuals from Family 1 (red, orange), one from Family 3 (brown) and three affected individuals from Family 19 (blue, green, purple), compared to 69 individuals without FAME using TruSeq Nano (grey) or KAPA Hyper (tan) library preparation. Panel A displays estimated repeat size by Expansion Hunter while panel B shows the empirical cumulative distribution functions from exSTRa. Note the high variability of allele sizes of the endogenous AAAAT repeat. Data underlying this figure is provided in the Source Data file.

**Supplementary Figure 2. Pedigrees of 22 families typically affected by FAME** (Fig. S2a-2v follow on multiple pages). Pedigrees for 22 tested families with FAME as per Table 1 in the main text. Keys on each page apply to all pedigrees on that page. Chromosome 2 markers are shown in mapped families where available.

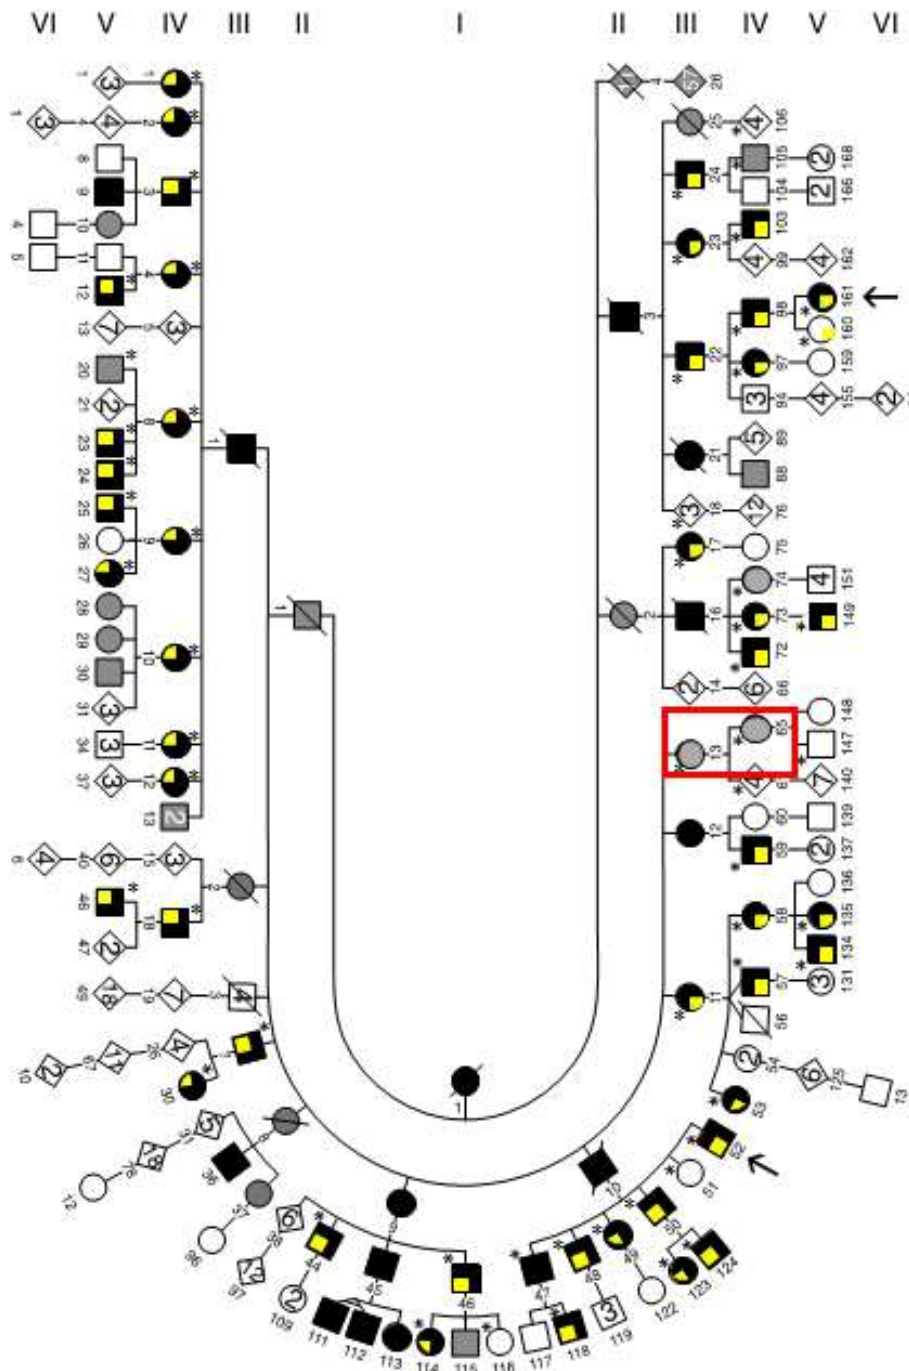

**a. Family 1**

- FAME
- ATTT EXPANSION
- CLINICAL STATUS UNCERTAIN
- UNIDENTIFIED EPILEPSY
- \* DNA TESTED

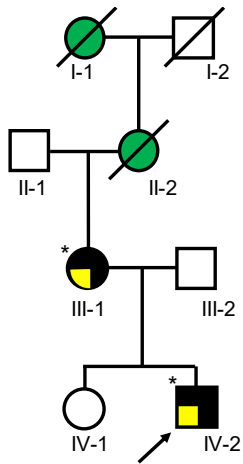

b. Family 2

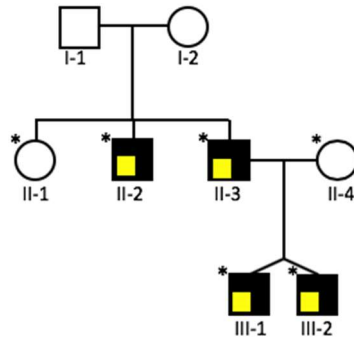

c. Family 3

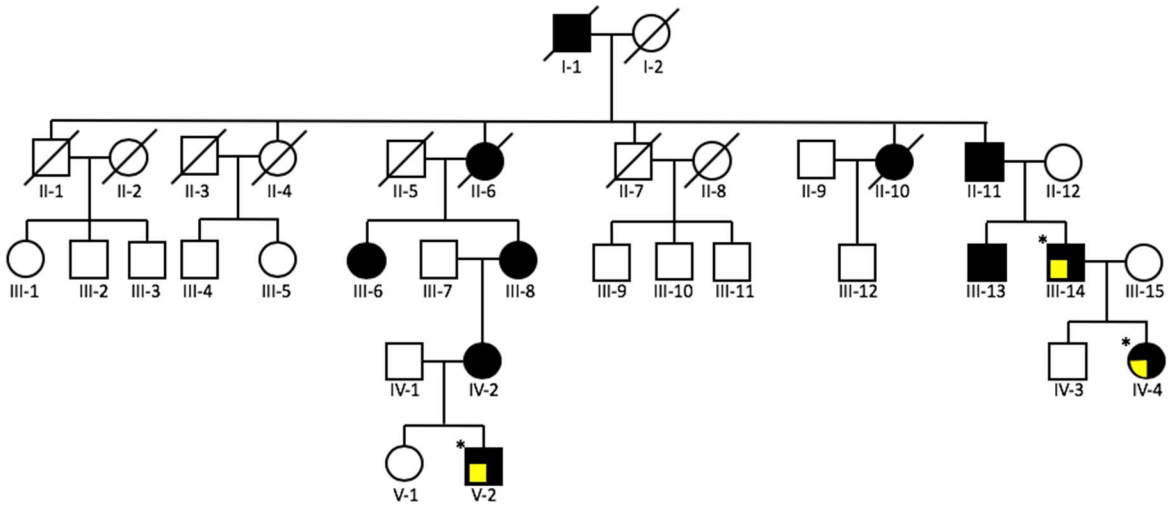

d. Family 4

-  FAME
-  ATTC EXPANSION
-  CLINICAL STATUS UNCERTAIN
-  UNIDENTIFIED EPILEPSY
- \* DNA TESTED

-  FAME
-  ATTC EXPANSION
-  CLINICAL STATUS UNCERTAIN
-  UNIDENTIFIED EPILEPSY
- \* DNA TESTED

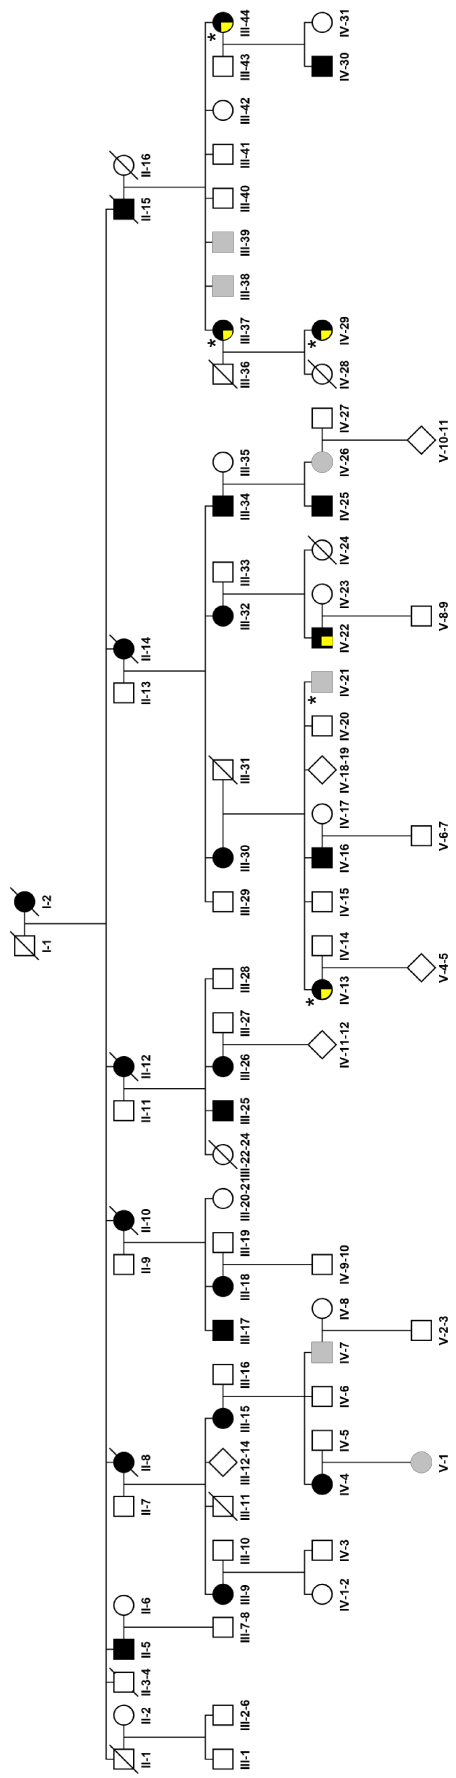

e. Family 5

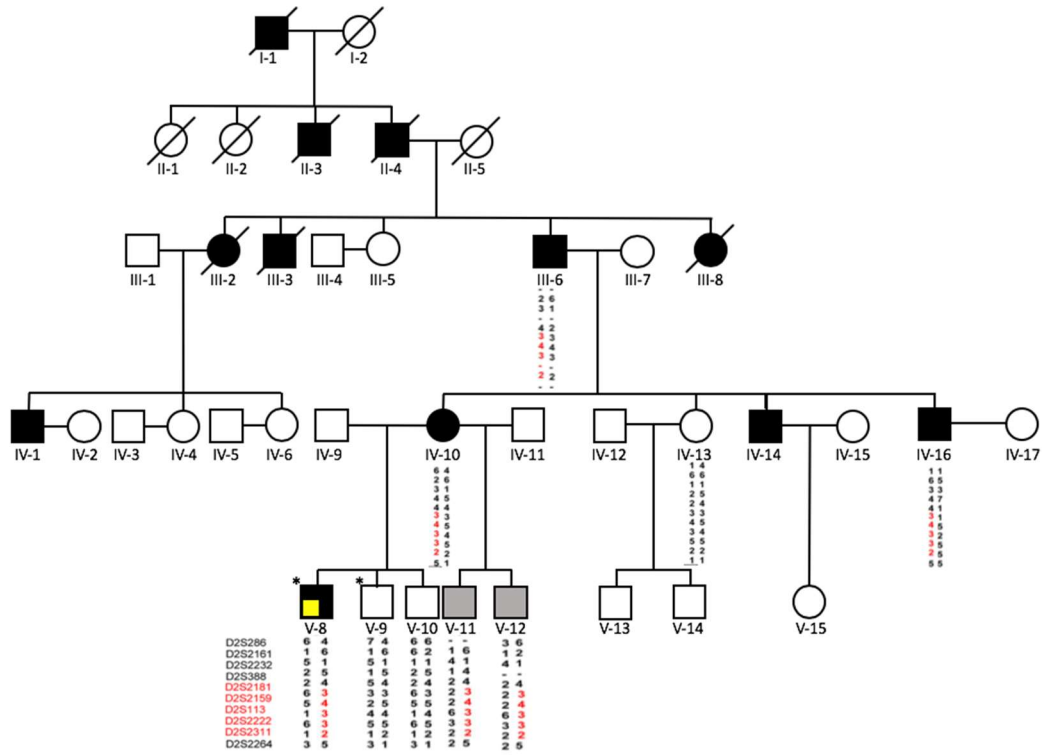

f. Family 6

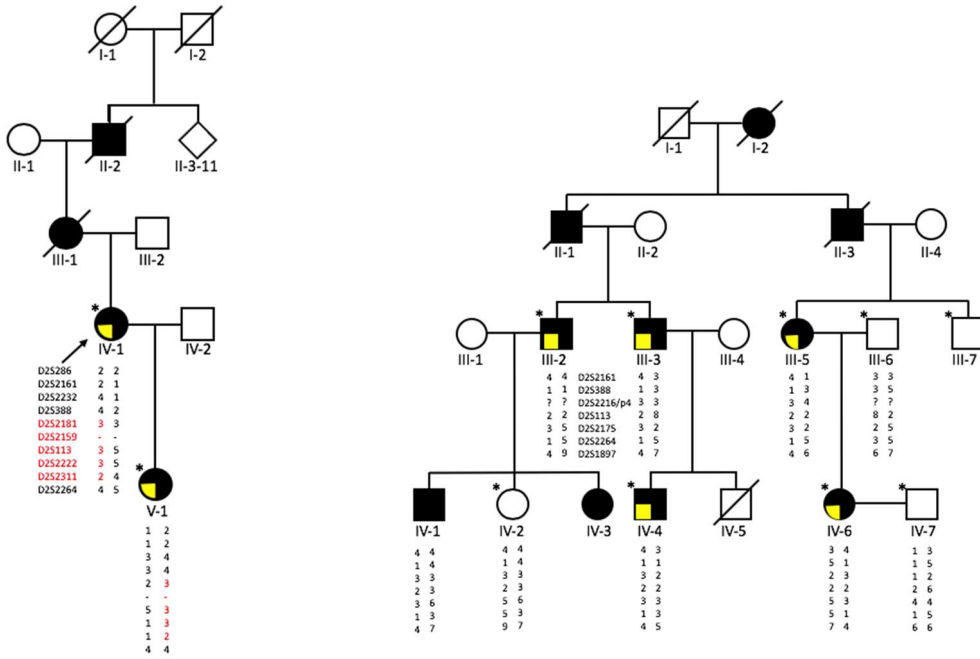

g. Family 7

h. Family 8

- FAME
- ATTC EXPANSION
- CLINICAL STATUS UNCERTAIN
- UNIDENTIFIED EPILEPSY
- \* DNA TESTED

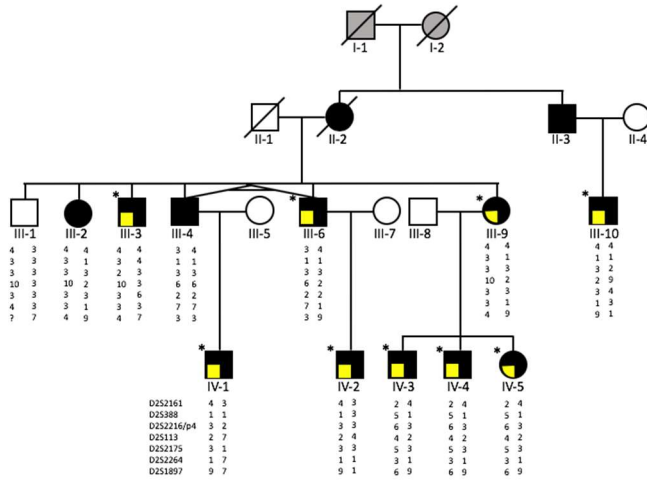

i. Family 9

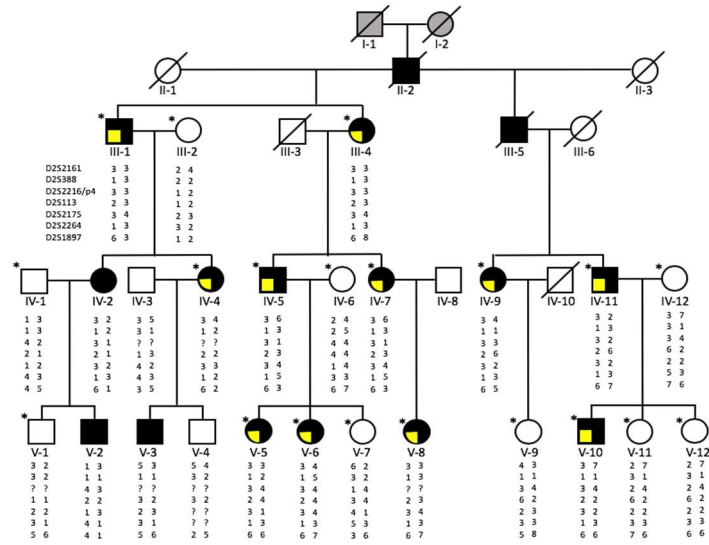

j. Family 10

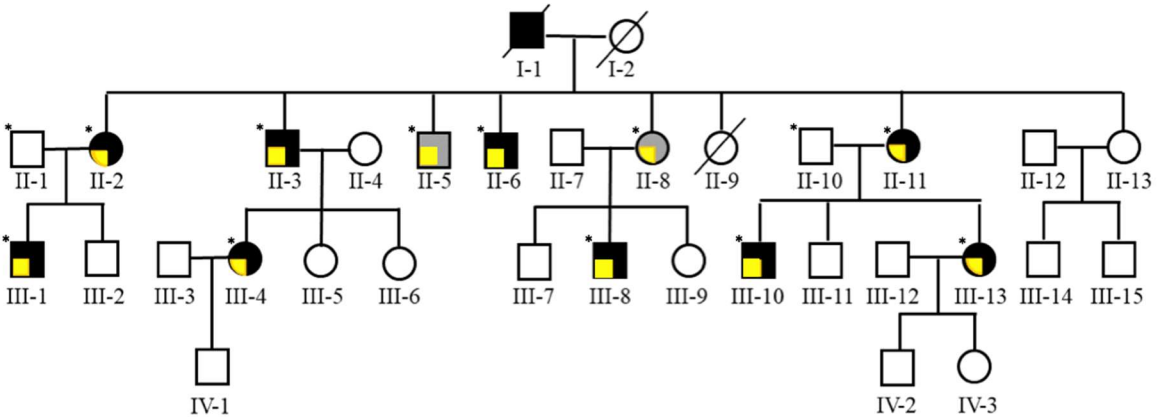

k. Family 11

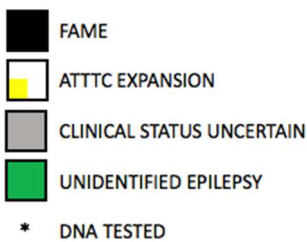

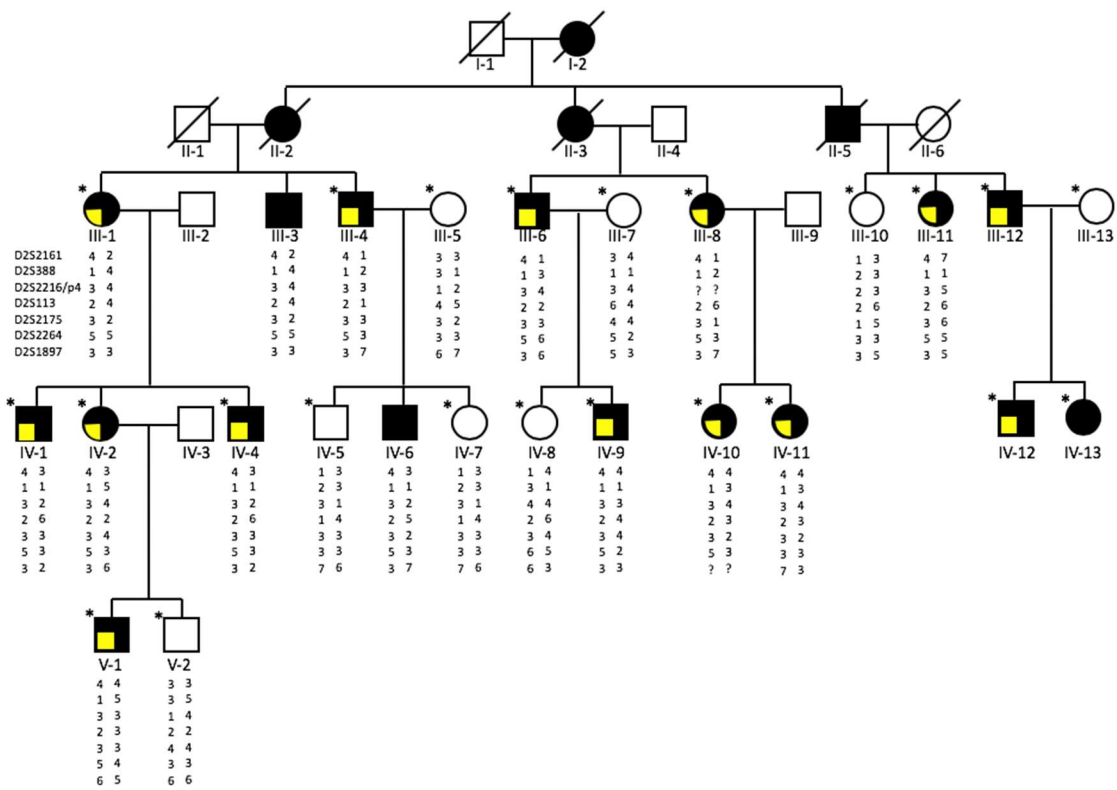

I. Family 12

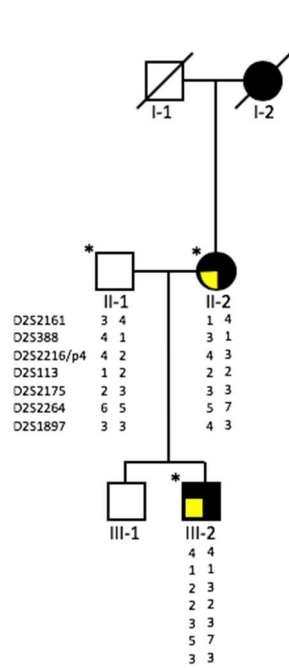

m. Family 13

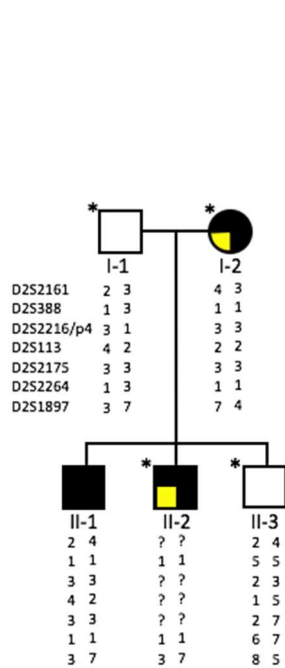

n. Family 14

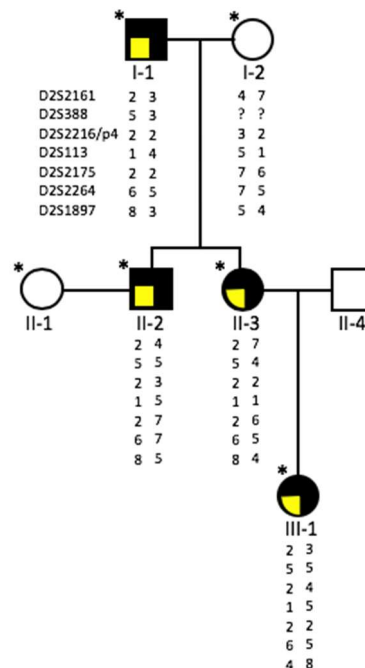

o. Family 15

- FAME
- ATTC EXPANSION
- CLINICAL STATUS UNCERTAIN
- UNIDENTIFIED EPILEPSY
- \* DNA TESTED



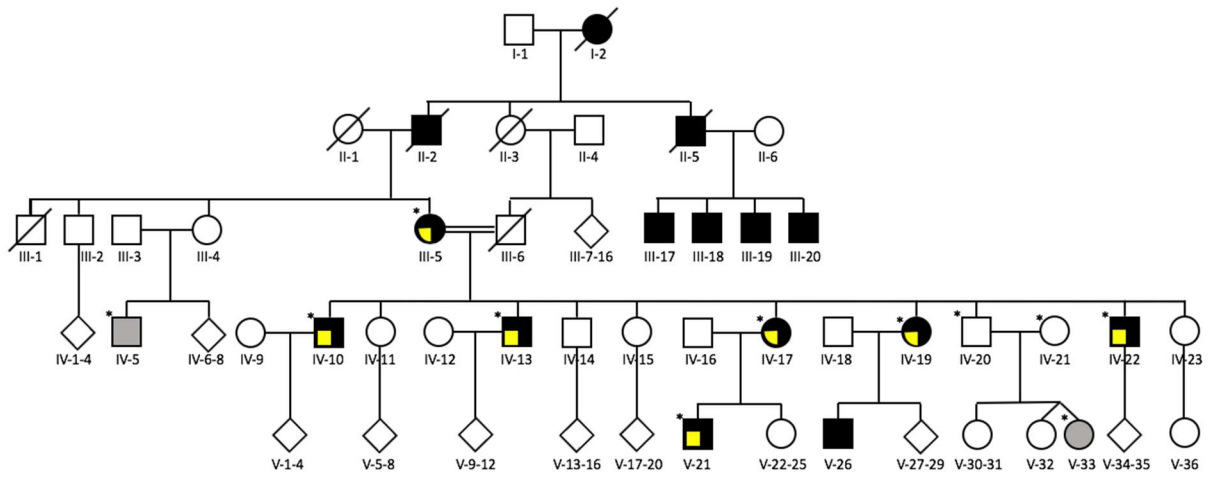

p. Family 16

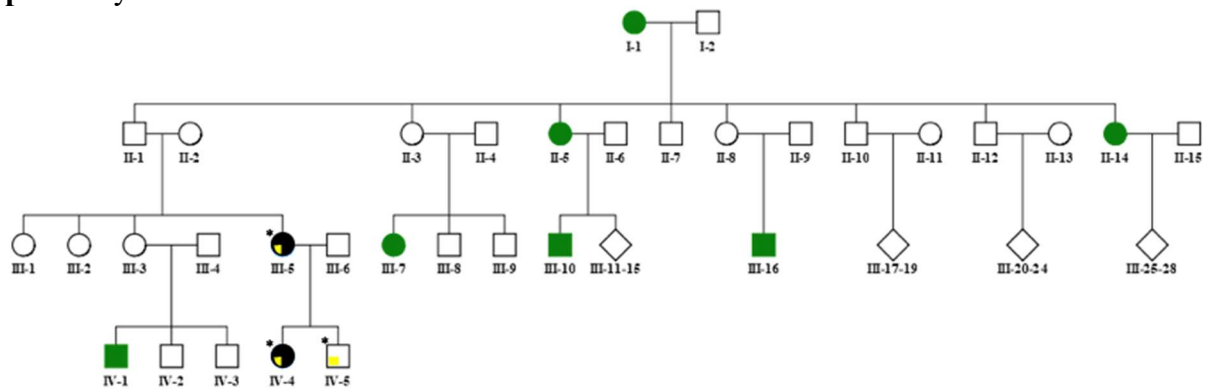

q. Family 17

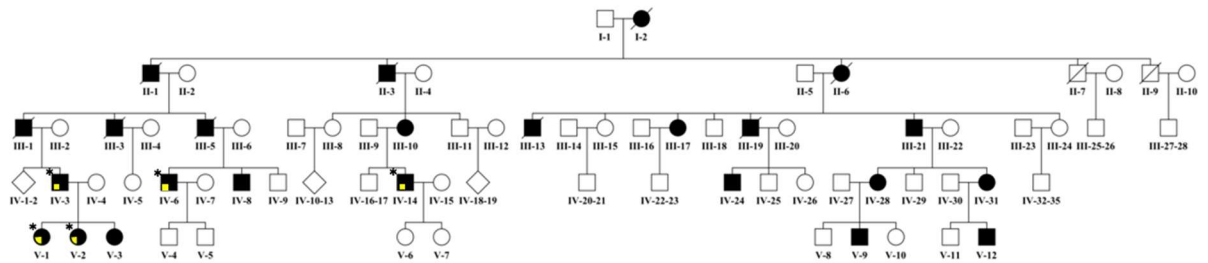

r. Family 18

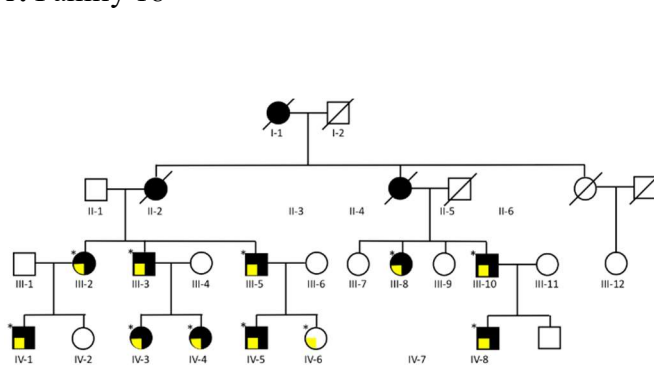

s. Family 19

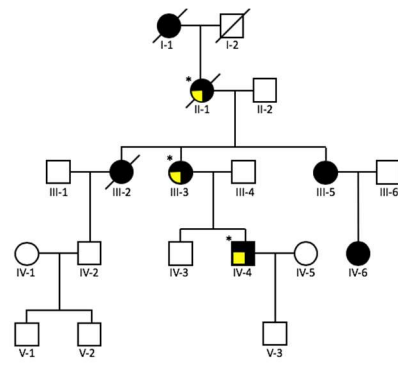

t. Family 20

- FAME
- ATTTC EXPANSION
- CLINICAL STATUS UNCERTAIN
- UNIDENTIFIED EPILEPSY
- \* DNA TESTED

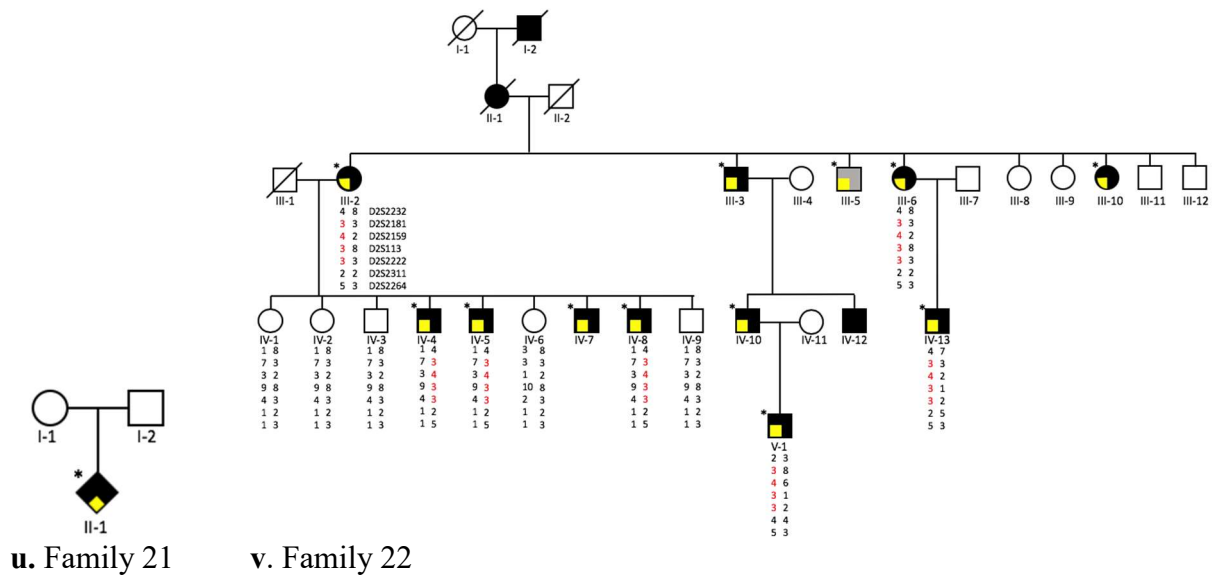

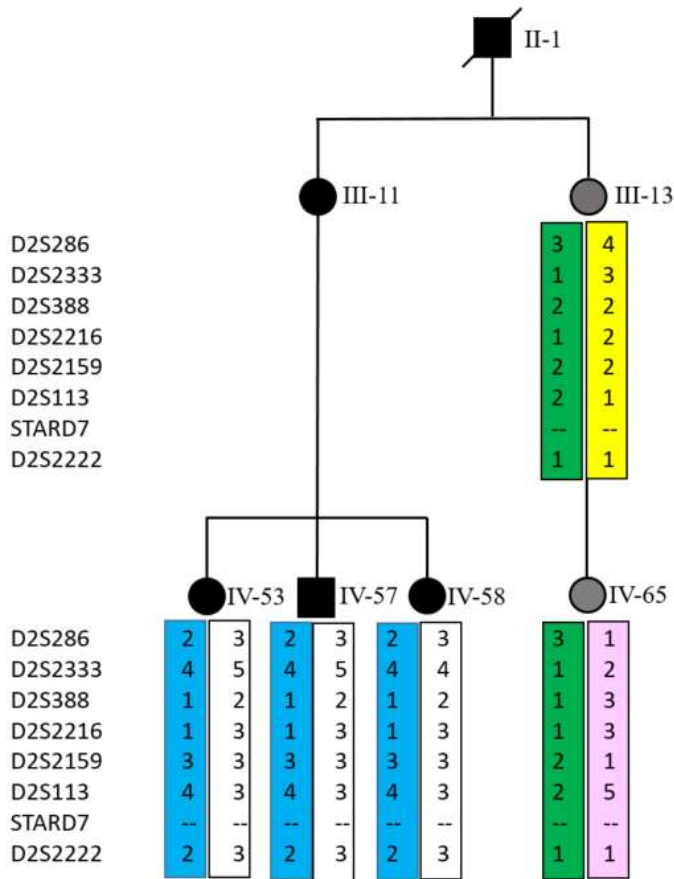

**Supplementary Figure 3. Family 1 microsatellite markers**

Microsatellite markers for selected members of Family 1 show family members III-13 and IV-65 do not share the same haplotypes as IV-53, IV-57 and IV-58 with confirmed diagnosis and positive for the STARD7 ATTTC expansion.

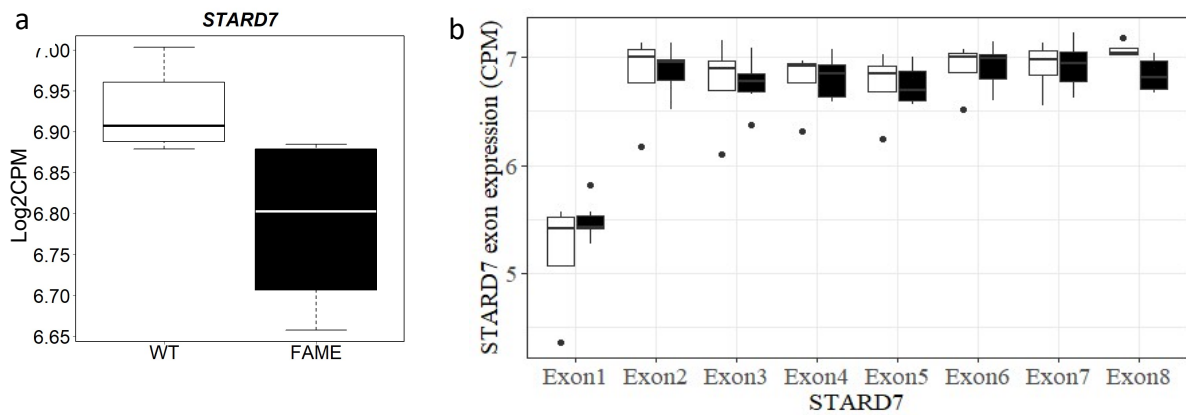

#### Supplementary Figure 4. RNA-Seq Expression of STARD7

**a.** Boxplot of *STARD7* gene expression in fibroblasts represented by log<sub>2</sub> transformed CPM (read counts per million mapped reads) values. Data represent control fibroblast (white box; n=4) and FAME fibroblasts (black box; n=6). The difference between groups is not significant (log base 2-fold change 0.0432, p=0.838 FDR=1). **b.** Log<sub>2</sub> CPM values of each of the eight exons of *STARD7* transcript ENST00000337288.9. Data underlying this figure is provided in the Source Data file.

## Supplementary Tables

**Supplementary Table 1. Additional phenotypes and mapping information**

| Family | Nationality                                 | Total affected | ID                                   | Dementia                  | DRE  | Ataxia | Evidence for chr2 linkage                                                                                                                                                                         | Other                                                                                                                | References                                                                                       |
|--------|---------------------------------------------|----------------|--------------------------------------|---------------------------|------|--------|---------------------------------------------------------------------------------------------------------------------------------------------------------------------------------------------------|----------------------------------------------------------------------------------------------------------------------|--------------------------------------------------------------------------------------------------|
| 1      | Australian/New Zealand of European ancestry | 55             | 0/55                                 | 1/55 (88y; unknown onset) | 0/55 | 0/55   | Chr2 linkage with maximum LOD=4.5 <sup>a</sup>                                                                                                                                                    | Migraine: 18/55                                                                                                      | Crompton <i>et al.</i> 2012 <sup>1</sup>                                                         |
| 2      | Italian                                     | 2              | 0/2                                  | 0/2                       | 0/2  | 0/2    | No linkage to chr2                                                                                                                                                                                | Psychiatric symptoms 1/2                                                                                             |                                                                                                  |
| 3      | Italian                                     | 4              | Mild to moderate 1/4; borderline 1/4 | 0/4                       | 4/4  | 0/4    | Chr2 suggestive linkage with maximum LOD = 1.12                                                                                                                                                   | Prominent visuospatial impairment in 4/4<br>Psychiatric symptoms (reoccurring thoughts and compulsive behaviour) 1/4 | Suppa <i>et al.</i> 2009 <sup>2</sup>                                                            |
| 4      | Italian                                     | 11             | Mild 3/11; moderate 1/11             | 0/11                      | 2/11 | 0/11   | <i>ADRA2B</i> ;<br>c.675_686delTGGTGGGGC<br>TTTinsGTTTGGCAG;<br>p.H225_L229delinsQ225_F<br>_G_R228<br>Chr2 linkage with maximum LOD = 3.46                                                        |                                                                                                                      | Guerrini <i>et al.</i> 2001, de Fusco <i>et al.</i> 2013 <sup>3,4</sup>                          |
| 5      | Italian                                     | 25             | 1/16                                 | 1/16 (58y)                | 0/16 | 1/16   | Chr2 linkage with maximum LOD = 3.5                                                                                                                                                               | Migraine/headache: 4/16; Psychiatric disorders (depression and / or anxiety with panic attacks) 6/16                 | Licchetta <i>et al.</i> 2013 <sup>5</sup>                                                        |
| 6      | Italian                                     | 12 (3 studied) | 0/3                                  | 0/3                       | 1/3  | 2/3    | Linkage to chr2 and chr8 previously excluded however removal of uncertain cases (V-9 to V-12) shows segregation of markers to chr2 and this family shares the Southern Italian FAME2 haplotype of | Migraine/headache: 2/3; Psychiatric disorders 1/3                                                                    | Gardella <i>et al.</i> 2006 <sup>6</sup> .<br>Family 3 in Henden <i>et al.</i> 2015 <sup>7</sup> |

|    |         |                 |      |                              |      |           |                                                                                                                                                                                                 |                              |                                                                                     |
|----|---------|-----------------|------|------------------------------|------|-----------|-------------------------------------------------------------------------------------------------------------------------------------------------------------------------------------------------|------------------------------|-------------------------------------------------------------------------------------|
|    |         |                 |      |                              |      |           | known linked families (Figure S2f).                                                                                                                                                             |                              |                                                                                     |
| 7  | Italian | 4               | 0/4  | Not known                    | 0/4  | Not known | This family segregates the Southern Italian FAME2 haplotype of known linked families (Figure S2g).                                                                                              | Psychiatric disorders<br>1/4 |                                                                                     |
| 8  | Italian | 10 (6 studied)  | 0/6  | 1/6 (75y; onset after 70 y)  | 0/6  | 0/6       | Chr2 suggestive linkage with maximum LOD = 2.1                                                                                                                                                  |                              | Madia <i>et al.</i> 2008 <sup>8</sup>                                               |
| 9  | Italian | 13 (11 studied) | 0/11 | 0/11                         | 0/11 | 0/11      | Chr2 implicated by cumulative linkage with family 10 maximum LOD = 3.32 (this family LOD = 2.42)                                                                                                |                              | de Falco <i>et al.</i> 2003 <sup>9</sup>                                            |
| 10 | Italian | 16 (14 studied) | 0/14 | 1/14 (82y; onset after 70 y) | 0/14 | 0/14      | Chr2 implicated by cumulative linkage with family 9 maximum LOD = 3.32 (this family LOD = 0.9)                                                                                                  |                              | de Falco <i>et al.</i> 2003 <sup>9</sup>                                            |
| 11 | Italian | 10 (5 studied)  | 0/5  | 1/5 (79y; onset after 70 y)  | 0/5  | 0/5       | No evidence for or against linkage to chr2                                                                                                                                                      |                              | Coppola <i>et al.</i> 2016 <sup>10</sup>                                            |
| 12 | Italian | 21 (17 studied) | 0/5  | 0/17                         | 1/17 | 0/17      | Chr2 linkage with maximum LOD = 5.9                                                                                                                                                             |                              | Striano <i>et al.</i> 2005 <sup>11</sup>                                            |
| 13 | Italian | 3               | 0/3  | 0/3                          | 0/3  | 0/3       | Chr2 markers suggest affected individuals have the known Southern Italian FAME2 haplotype                                                                                                       |                              | Coppola <i>et al.</i> 2016 <sup>10</sup> ; Striano <i>et al.</i> 2004 <sup>12</sup> |
| 14 | Italian | 3               | 0/3  | 0/3                          | 0/3  | 0/3       | Chr2 suggestive linkage with maximum LOD = 1.5                                                                                                                                                  |                              | Coppola <i>et al.</i> 2011 <sup>13</sup> ; Striano <i>et al.</i> 2004 <sup>12</sup> |
| 15 | Italian | 4               | 0/4  | 0/4                          | 2/4  | 0/4       | <i>ADRA2B</i> ;<br>c.675_686delTGGTGGGGC<br>TTTinsGTTTGGCAG;<br>p.H225_L229delinsQ225_F<br>_G_R228<br>Chr2 markers suggest affected individuals have the known Northern Italian FAME2 haplotype |                              | de Fusco <i>et al.</i> 2013 <sup>4</sup>                                            |

|    |                                      |                               |           |                             |           |           |                                                                                    |                                                  |                                                                              |
|----|--------------------------------------|-------------------------------|-----------|-----------------------------|-----------|-----------|------------------------------------------------------------------------------------|--------------------------------------------------|------------------------------------------------------------------------------|
| 16 | Iraqi of Sephardic Jewish ancestry   | 15 (10 studied)               | 0/10      | 0/8 (2 deceased: not known) | 1/10      | 0/10      | Chr2 suggestive linkage with maximum LOD = 1.8                                     |                                                  |                                                                              |
| 17 | Israeli of Sephardic Jewish ancestry | 2                             | 0/2       | 0/2                         | 0/2       | 0/2       | No evidence for or against linkage to chr2                                         |                                                  |                                                                              |
| 18 | South African of European ancestry   | 24 (15 studied)               | 0/15      | 0/15                        | 0/15      | 0/15      | No evidence for or against linkage to chr2                                         | Lower limb myoclonus 1/15<br>Genetics:           | van Coller <i>et al.</i> 2017 <sup>14</sup>                                  |
| 19 | French/ Spanish                      | 13                            | 0/10      | 0/10                        | 0/10      | 0/10      | Chr2 linkage with maximum LOD = 3.3                                                |                                                  | Saint-Martin <i>et al.</i> 2008; Labauge <i>et al.</i> 2002 <sup>15,16</sup> |
| 20 | French                               | 7 (2 studied)                 | Not known | Not known                   | Not known | Not known | Chr2 markers in three affected individuals do not exclude the known FAME2 interval | Migraine: 1/2                                    | Henden <i>et al.</i> 2016 <sup>7</sup>                                       |
| 21 | Syrian                               | 1                             | Not known | Not known                   | Not known | 0/1       | No evidence for or against linkage to chr2                                         |                                                  |                                                                              |
| 22 | Italian                              | 11 (10 studied <sup>b</sup> ) | 2/10      | 0/10                        | 1/10      | 0/10      | Chr2 suggestive linkage with maximum LOD = 1.8                                     | Psychiatric symptoms 2/10, Epileptic spasms 2/10 |                                                                              |

<sup>a</sup> All maximum LOD scores are reported with recombination fraction  $\theta=0$ .

<sup>b</sup> One family member last evaluated at 9 years of age.

Abbreviations: DRE: Drug resistant epilepsy; ID: Intellectual disability; LOD: Logarithm of the odds; y: years; n: number of individuals.

## Supplementary Table 2. exSTRa database

### exSTRa FAME2 loci (requires: exSTRa >=0.8)

| locus       | long_name   | gene   | motif     | strand | chrom | hg19_start | hg19_end | perIndel | perMatch | location |
|-------------|-------------|--------|-----------|--------|-------|------------|----------|----------|----------|----------|
| FAME2-AAAAT | FAME2-AAAAT | STARD7 | AAAA<br>T | +      | chr2  | 96862805   | 96862859 | 0        | 100      | intron   |
| FAME2-AAATG | FAME2-AAATG | STARD7 | AAAT<br>G | +      | chr2  | 96862825   | 96862826 | 0        | 100      | intron   |



**Supplementary Table 3. Primer Sequences**

| <b>Primer</b>                                                    | <b>Sequence 5'-3'</b>                                      |
|------------------------------------------------------------------|------------------------------------------------------------|
| STARD7F                                                          | GGCTACTTACGTGCCAGATAAC                                     |
| STARD7R                                                          | TGCCCAGCTACACTGTCTCTT                                      |
| RP-PCR-FAME2-P1                                                  | [FAM]-GGCTACTTACGTGCCAGATAAC                               |
| RP-PCR-FAME2-P2/<br>RP-PCR STARD7R                               | [FAM]-TGCCCAGCTACACTGTCTCTT                                |
| RP-PCR-FAME2-P4.5                                                | TACGCATCCCAGTTTGAGACGAAAATAAA<br>ATAAAATAAAATAAAATAAAAT    |
| RP-PCR-FAME2-P4.6                                                | TACGCATCCCAGTTTGAGACGAAATGAAA<br>TGAAATGAAATGAAATGAAATG    |
| RP-PCR-FAME2-P4.7/ RP-PCR-<br>STARD7-P4.T                        | TACGCATCCCAGTTTGAGACGTTTTATTTT<br>ATTTTATTTTATTTTATTTTA    |
| RP-PCR-FAME2-P4.8/ RP-PCR-<br>STARD7-P4.C                        | TACGCATCCCAGTTTGAGACGTTTCATTTC<br>ATTTTCATTTTCATTTTCATTTCA |
| RP-PCR-P3/<br>RP-PCR-STARD7-P3                                   | TACGCATCCCAGTTTGAGACG                                      |
| HPRT_F1                                                          | TGACTGCGCAAACAATGCA                                        |
| HPRT_R1                                                          | GGTCCTTTTCACCAGCAAGCT                                      |
| STARD7Ex1F1                                                      | GCCATGCCTCTGCCTTGATG                                       |
| STARD7Ex2R1                                                      | TTCTTCCAACCGCTTCATCTC                                      |
| STARD7Ex3F (primer bank<br>accession: 151301034c3) <sup>17</sup> | GTGACACCTCGGCAGTTCTTC                                      |
| STARD7Ex4R (primer bank<br>accession: 151301034c3) <sup>17</sup> | ACCTCGGAACCACTAACCACA                                      |

## Supplementary References

1. Crompton, D. E. *et al.* Familial adult myoclonic epilepsy: recognition of mild phenotypes and refinement of the 2q locus. *Arch. Neurol.* **69**, 474–481 (2012).
2. Suppa, A. *et al.* Clinical, neuropsychological, neurophysiologic, and genetic features of a new Italian pedigree with familial cortical myoclonic tremor with epilepsy. *Epilepsia* **50**, 1284–1288 (2009).
3. Guerrini, R. *et al.* Autosomal dominant cortical myoclonus and epilepsy (ADCME) with complex partial and generalized seizures: A newly recognized epilepsy syndrome with linkage to chromosome 2p11.1-q12.2. *Brain J. Neurol.* **124**, 2459–2475 (2001).
4. De Fusco, M. *et al.* The  $\alpha 2B$  -adrenergic receptor is mutant in cortical myoclonus and epilepsy. *Ann. Neurol.* (2013). doi:10.1002/ana.24028
5. Licchetta, L. *et al.* A novel pedigree with familial cortical myoclonic tremor and epilepsy (FCMTE): Clinical characterization, refinement of the FCMTE2 locus, and confirmation of a founder haplotype. *Epilepsia* **54**, 1298–1306 (2013).
6. Gardella, E. *et al.* Autosomal Dominant Early-onset Cortical Myoclonus, Photic-induced Myoclonus, and Epilepsy in a Large Pedigree. *Epilepsia* **47**, 1643–1649 (2006).
7. Henden, L. *et al.* Identity by descent fine mapping of familial adult myoclonus epilepsy (FAME) to 2p11.2-2q11.2. *Hum. Genet.* (2016). doi:10.1007/s00439-016-1700-8
8. Madia, F. *et al.* Benign adult familial myoclonic epilepsy (BAFME): evidence of an extended founder haplotype on chromosome 2p11.1-q12.2 in five Italian families. *Neurogenetics* **9**, 139–142 (2008).
9. de Falco, F. A. *et al.* Benign adult familial myoclonic epilepsy: genetic heterogeneity and allelism with ADCME. *Neurology* **60**, 1381–1385 (2003).

10. Coppola, A. *et al.* Psychiatric comorbidities in patients from seven families with autosomal dominant cortical tremor, myoclonus, and epilepsy. *Epilepsy Behav. EB* **56**, 38–43 (2016).
11. Striano, P., Madia, F., Minetti, C., Striano, S. & Zara, F. Electroclinical and genetic findings in a family with cortical tremor, myoclonus, and epilepsy. *Epilepsia* **46**, 1993–1995 (2005).
12. Striano, P. *et al.* A New Benign Adult Familial Myoclonic Epilepsy (BAFME) Pedigree Suggesting Linkage to Chromosome 2p11.1-q12.2. *Epilepsia* **45**, 190–192 (2004).
13. Coppola, A. *et al.* Natural history and long-term evolution in families with autosomal dominant cortical tremor, myoclonus, and epilepsy. *Epilepsia* **52**, 1245–1250 (2011).
14. van Coller, R., van Rootselaar, A.-F., Schutte, C. & van der Meyden, C. H. Familial cortical myoclonic tremor and epilepsy: Description of a new South African pedigree with 30 year follow up. *Parkinsonism Relat. Disord.* **38**, 35–40 (2017).
15. Saint-Martin, C. *et al.* Refinement of the 2p11.1-q12.2 locus responsible for cortical tremor associated with epilepsy and exclusion of candidate genes. *Neurogenetics* **9**, 69–71 (2008).
16. Labauge, P. *et al.* Absence of linkage to 8q24 in a European family with familial adult myoclonic epilepsy (FAME). *Neurology* **58**, 941–944 (2002).
17. Spandidos, A., Wang, X., Wang, H. & Seed, B. PrimerBank: a resource of human and mouse PCR primer pairs for gene expression detection and quantification. *Nucleic Acids Res.* **38**, D792–D799 (2009).
