# Supplementary material for: Intronic ATTTC repeat expansions in STARD7 in familial adult myoclonic epilepsy linked to chromosome 2
Source: PubMed Central journal article supplement (PMC6820779; doi:10.1038/s41467-019-12671-y), 2019-10-29
Supplement: 41467_2019_12671_MOESM2_ESM.pdf [file 41467_2019_12671_MOESM2_ESM.pdf]

### Supplementary Data 1. Combined summary of RP-PCR results from all families

A=Affected, N=Not affected, U=Uncertain clinical diagnosis.

| Family | DNA number | Disease Status | Pedigree Number | TTTCA RP-PCR trace |
|--------|------------|----------------|-----------------|--------------------|
| N/A    | Water      | Control        | N/A             |                    |
| N/A    | Blood bank | Control        | N/A             |                    |
| 1      | T19334     | A              | III-7           |                    |
| 1      | T19327     | A              | III-11          |                    |
| 1      | T19337     | A              | III-13          |                    |
| 1      | T20147     | A              | III-17          |                    |
| 1      | T19298     | N              | III-18          |                    |

| Family | DNA number | Disease Status | Pedigree Number | TTTCA RP-PCR trace |
|--------|------------|----------------|-----------------|--------------------|
| 1      | T19293     | A              | III-22          |                    |
| 1      | T19297     | A              | III-23          |                    |
| 1      | T19011     | A              | III-24          |                    |
| 1      | T20146     | A              | IV-1            |                    |
| 1      | T19328     | A              | IV-2            |                    |
| 1      | T20298     | A              | IV-3            |                    |
| 1      | T19329     | A              | IV-4            |                    |
| 1      | T19324     | A              | IV-8            |                    |
| 1      | T19323     | A              | IV-9            |                    |

| Family | DNA number | Disease Status | Pedigree Number | TTTCA RP-PCR trace |
|--------|------------|----------------|-----------------|--------------------|
| 1      | T19304     | A              | IV-10           |                    |
| 1      | T19325     | A              | IV-11           |                    |
| 1      | T19305     | A              | IV-12           |                    |
| 1      | T19318     | A              | IV-18           |                    |
| 1      | T19320     | A              | IV-30           |                    |
| 1      | T20016     | A              | IV-44           |                    |
| 1      | T20197     | A              | IV-46           |                    |
| 1      | T19340     | A              | IV-47           |                    |

| Family | DNA number | Disease Status | Pedigree Number | TTTCA RP-PCR trace |
|--------|------------|----------------|-----------------|--------------------|
| 1      | T19225     | A              | IV-48           |                    |
| 1      | T19299     | A              | IV-49           |                    |
| 1      | 39290      | A              | IV-50           |                    |
| 1      | T19314     | N              | IV-51           |                    |
| 1      | T19315     | A              | IV-52           |                    |
| 1      | T19302     | A              | IV-53           |                    |
| 1      | T19331     | A              | IV-57           |                    |
| 1      | T19303     | A              | IV-58           |                    |

| Family | DNA number | Disease Status | Pedigree Number | TTTCA RP-PCR trace |
|--------|------------|----------------|-----------------|--------------------|
| 1      | T19316     | A              | IV-59           |                    |
| 1      | T19336     | N              | IV-61           |                    |
| 1      | T19335     | N              | IV-62           |                    |
| 1      | T19301     | A              | IV-65           |                    |
| 1      | T19319     | A              | IV-72           |                    |
| 1      | T19300     | A              | IV-73           |                    |
| 1      | T19063     | A              | IV-97           |                    |
| 1      | T18881     | A              | IV-98           |                    |

| Family | DNA number | Disease Status | Pedigree Number | TTTCA RP-PCR trace |
|--------|------------|----------------|-----------------|--------------------|
| 1      | T19295     | A              | IV-103          |                    |
| 1      | T19342     | U              | IV-105          |                    |
| 1      | T20397     | N              | IV-106          |                    |
| 1      | T20396     | N              | IV-107          |                    |
| 1      | T19332     | A              | V-12            |                    |
| 1      | T19326     | U              | V-20            |                    |
| 1      | T19322     | A              | V-23            |                    |
| 1      | T19343     | A              | V-24            |                    |

| Family | DNA number | Disease Status | Pedigree Number | TTTCA RP-PCR trace |
|--------|------------|----------------|-----------------|--------------------|
| 1      | T19312     | A              | V-25            |                    |
| 1      | T19313     | A              | V-27            |                    |
| 1      | T19317     | A              | V-46            |                    |
| 1      | T20002     | A              | V-114           |                    |
| 1      | T20356     | N              | V-116           |                    |
| 1      | T19339     | A              | V-118           |                    |
| 1      | T19206     | A              | V-123           |                    |
| 1      | T26100     | A              | V-124           |                    |



| Family | DNA number | Disease Status | Pedigree Number | TTTCA RP-PCR trace |
|--------|------------|----------------|-----------------|--------------------|
| 1      | T19341     | A              | V-134           |                    |
| 1      | T20219     | A              | V-135           |                    |
| 1      | T19338     | N              | V-147           |                    |
| 1      | T19321     | A              | V-149           |                    |
| 1      | T19018     | A              | V-160           |                    |
| 1      | T18880     | A              | V-161           |                    |
| 2      | T23990     | A              | III-1           |                    |
| 2      | T23989     | A              | IV-2            |                    |



| Family | DNA number | Disease Status | Pedigree Number | TTTCA RP-PCR trace                                                                   |
|--------|------------|----------------|-----------------|--------------------------------------------------------------------------------------|
| 3      | PM0198     | N              | II-1            | 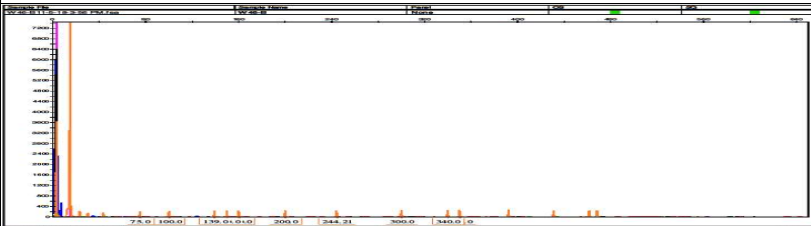   |
| 3      | PM0199     | A              | II-2            |    |
| 3      | PM0197     | A              | II-3            |    |
| 3      | PM0200     | N              | II-4            |   |
| 3      | PM0195     | A              | III-1           |  |
| 3      | PM0196     | A              | III-2           |  |
| 4      | 60122-619V | A              | III-14          |  |
| 4      | 60121-618V | A              | IV-4            |  |

| Family | DNA number | Disease Status | Pedigree Number | TTTCA RP-PCR trace |
|--------|------------|----------------|-----------------|--------------------|
| 4      | 60124-093C | A              | V-2             |                    |
| 5      | 60530-F10N | A              | III-37          |                    |
| 5      | 60056      | A              | III-44          |                    |
| 5      | 60057      | A              | IV-13           |                    |
| 5      | 60058      | N              | IV-21           |                    |
| 5      | 60531-F11N | A              | IV-29           |                    |
| 6      | 60059      | A              | V-8             |                    |
| 6      | 60060      | N              | V-9             |                    |

| Family | DNA number | Disease Status | Pedigree Number | TTTCA RP-PCR trace                                |
|--------|------------|----------------|-----------------|---------------------------------------------------|
| 7      | 60062      | A              | IV-1            | <p>T11_G08_2018-05-28.fsa   T11   DM_TP_PCR</p>   |
| 7      | 60061      | A              | V-1             | <p>T10_F08_2018-05-28.fsa   T10   DM_TP_PCR</p>   |
| 8      | 60176      | A              | III-2           | <p>F_48_H06_2018-06-05.fsa   F_48   DM_TP_PCR</p> |
| 8      | 60177      | A              | III-3           | <p>F_49_A07_2018-06-05.fsa   F_49   DM_TP_PCR</p> |
| 8      | 60178      | A              | III-5           | <p>F_50_B07_2018-06-05.fsa   F_50   DM_TP_PCR</p> |
| 8      | 60179      | N              | III-6           | <p>F_51_C07_2018-06-05.fsa   F_51   DM_TP_PCR</p> |
| 8      | 60180      | N              | III-7           | <p>F_52_D07_2018-06-05.fsa   F_52   DM_TP_PCR</p> |
| 8      | 60183      | A              | IV-4            | <p>F_55_G07_2018-06-05.fsa   F_55   DM_TP_PCR</p> |

| Family | DNA number | Disease Status | Pedigree Number | TTTCA RP-PCR trace |
|--------|------------|----------------|-----------------|--------------------|
| 8      | 60184      | A              | IV-6            |                    |
| 8      | 60185      | N              | IV-7            |                    |
| 9      | 60211      | N              | III-1           |                    |
| 9      | 60212      | A              | III-2           |                    |
| 9      | 60213      | A              | III-3           |                    |
| 9      | 60214      | A              | III-6           |                    |
| 9      | 60215      | A              | III-9           |                    |
| 9      | 60216      | A              | III-10          |                    |

| Family | DNA number | Disease Status | Pedigree Number | TTTCA RP-PCR trace |
|--------|------------|----------------|-----------------|--------------------|
| 9      | 60217      | A              | IV-1            |                    |
| 9      | 60218      | A              | IV-2            |                    |
| 9      | 60219      | A              | IV-3            |                    |
| 9      | 60220      | A              | IV-4            |                    |
| 9      | 60221      | A              | IV-5            |                    |
| 10     | 60190      | A              | III-1           |                    |
| 10     | 60191      | N              | III-2           |                    |
| 10     | 60192      | A              | III-4           |                    |

| Family | DNA number | Disease Status | Pedigree Number | TTTCA RP-PCR trace |
|--------|------------|----------------|-----------------|--------------------|
| 10     | 60193      | N              | IV-1            |                    |
| 10     | 60195      | A              | IV-4            |                    |
| 10     | 60196      | A              | IV-5            |                    |
| 10     | 60197      | N              | IV-6            |                    |
| 10     | 60198      | A              | IV-7            |                    |
| 10     | 60199      | A              | IV-9            |                    |
| 10     | 60200      | A              | IV-11           |                    |
| 10     | 60201      | N              | IV-12           |                    |

| Family | DNA number | Disease Status | Pedigree Number | TTTCA RP-PCR trace |
|--------|------------|----------------|-----------------|--------------------|
| 10     | 60202      | N              | V-1             |                    |
| 10     | 60203      | A              | V-5             |                    |
| 10     | 60204      | A              | V-6             |                    |
| 10     | 60205      | N              | V-7             |                    |
| 10     | 60206      | A              | V-8             |                    |
| 10     | 60207      | N              | V-9             |                    |
| 10     | 60208      | A              | V-10            |                    |
| 10     | 60209      | N              | V-11            |                    |



| Family | DNA number | Disease Status | Pedigree Number | TTTCA RP-PCR trace |
|--------|------------|----------------|-----------------|--------------------|
| 10     | 60210      | N              | V-12            |                    |
| 11     | 60063      | N              | II-1            |                    |
| 11     | 60130      | A              | II-2            |                    |
| 11     | 60131      | A              | II-3            |                    |
| 11     | 60132      | U              | II-5            |                    |
| 11     | 60133      | A              | II-6            |                    |
| 11     | 60134      | U              | II-8            |                    |
| 11     | 60135      | N              | II-10           |                    |

| Family | DNA number | Disease Status | Pedigree Number | TTTCA RP-PCR trace |
|--------|------------|----------------|-----------------|--------------------|
| 11     | 60136      | A              | II-11           |                    |
| 11     | 60137      | A              | III-1           |                    |
| 11     | 60138      | A              | III-4           |                    |
| 11     | 60139      | A              | III-8           |                    |
| 11     | 60140      | A              | III-10          |                    |
| 11     | 60141      | A              | III-13          |                    |
| 12     | 60151      | A              | III-1           |                    |
| 12     | 60153      | A              | III-4           |                    |

| Family | DNA number | Disease Status | Pedigree Number | TTTCA RP-PCR trace |
|--------|------------|----------------|-----------------|--------------------|
| 12     | 60155      | A              | III-6           |                    |
| 12     | 60156      | N              | III-7           |                    |
| 12     | 60157      | A              | III-8           |                    |
| 12     | 60158      | N              | III-10          |                    |
| 12     | 60159      | A              | III-11          |                    |
| 12     | 60160      | A              | III-12          |                    |
| 12     | 60161      | N              | III-13          |                    |
| 12     | 60162      | A              | IV-1            |                    |

| Family | DNA number | Disease Status | Pedigree Number | TTTCA RP-PCR trace |
|--------|------------|----------------|-----------------|--------------------|
| 12     | 60163      | A              | IV-2            |                    |
| 12     | 60164      | A              | IV-4            |                    |
| 12     | 60165      | N              | IV-5            |                    |
| 12     | 60167      | N              | IV-7            |                    |
| 12     | 60168      | N              | IV-8            |                    |
| 12     | 60169      | A              | IV-9            |                    |
| 12     | 60170      | A              | IV-10           |                    |
| 12     | 60171      | A              | IV-11           |                    |

| Family | DNA number | Disease Status | Pedigree Number | TTTCA RP-PCR trace |
|--------|------------|----------------|-----------------|--------------------|
| 12     | 60172      | A              | IV-12           |                    |
| 12     | 60173      | A              | IV-13           |                    |
| 12     | 60174      | A              | V-1             |                    |
| 12     | 60175      | N              | V-2             |                    |
| 13     | 60142      | N              | II-1            |                    |
| 13     | 60143      | A              | II-2            |                    |
| 13     | 60144      | A              | III-2           |                    |

| Family | DNA number | Disease Status | Pedigree Number | TTTCA RP-PCR trace |
|--------|------------|----------------|-----------------|--------------------|
| 14     | 60186      | N              | I-1             |                    |
| 14     | 60187      | A              | I-2             |                    |
| 14     | 60188      | A              | II-2            |                    |
| 14     | 60189      | N              | II-3            |                    |
| 15     | 60145      | A              | I-1             |                    |
| 15     | 60146      | N              | I-2             |                    |
| 15     | 60147      | N              | II-1            |                    |
| 15     | 60148      | A              | II-2            |                    |

| Family | DNA number | Disease Status | Pedigree Number | TTTCA RP-PCR trace |
|--------|------------|----------------|-----------------|--------------------|
| 15     | 60149      | A              | II-3            |                    |
| 15     | 60150      | A              | III-1           |                    |
| 16     | 60037      | A              | III-5           |                    |
| 16     | 60036      | N              | IV-5            |                    |
| 16     | 60038      | A              | IV-10           |                    |
| 16     | 60039      | A              | IV-13           |                    |
| 16     | 60040      | A              | IV-17           |                    |
| 16     | 60041      | A              | IV-19           |                    |
| 16     | 60042      | N              | IV-20           |                    |



| Family | DNA number | Disease Status | Pedigree Number | TTTCA RP-PCR trace |
|--------|------------|----------------|-----------------|--------------------|
| 16     | 60043      | N              | IV-21           |                    |
| 16     | 60045      | A              | IV-22           |                    |
| 16     | 60046      | A              | V-21            |                    |
| 16     | 60044      | U              | V-33            |                    |
| 17     | 60222      | A              | III-5           |                    |
| 17     | 60094      | A              | IV-4            |                    |
| 17     | 60223      | N              | IV-5            |                    |
| 18     | 15         | A              | IV-3            |                    |

| Family | DNA number | Disease Status | Pedigree Number | TTTCA RP-PCR trace |
|--------|------------|----------------|-----------------|--------------------|
| 18     | 48         | A              | IV-6            |                    |
| 18     | 16         | A              | IV-14           |                    |
| 18     | 47         | A              | V-1             |                    |
| 18     | 46         | A              | V-2             |                    |
| 19     | 1          | A              | III-2           |                    |
| 19     | 5          | A              | III-3           |                    |
| 19     | 9          | A              | III-5           |                    |

| Family | DNA number | Disease Status | Pedigree Number | TTTCA RP-PCR trace |
|--------|------------|----------------|-----------------|--------------------|
| 19     | 14         | A              | III-8           |                    |
| 19     | 16         | A              | III-10          |                    |
| 19     | 3          | A              | IV-1            |                    |
| 19     | 7          | A              | IV-3            |                    |
| 19     | 8          | A              | IV-4            |                    |
| 19     | 11         | A              | IV-5            |                    |
| 19     | 12         | N              | IV-6            |                    |

| Family | DNA number | Disease Status | Pedigree Number | TTTCA RP-PCR trace |
|--------|------------|----------------|-----------------|--------------------|
| 19     | 18         | A              | IV-7            |                    |
| 20     | 1          | A              | II-1            |                    |
| 20     | 5          | A              | III-3           |                    |
| 20     | 12         | A              | IV-4            |                    |
| 22     | S1737      | A              | III-2           |                    |
| 22     | S1801      | A              | III-4           |                    |
| 22     | S1804      | A              | III-5           |                    |
| 22     | S1762      | A              | III-6           |                    |

| Family | DNA number | Disease Status | Pedigree Number | TTTCA RP-PCR trace |
|--------|------------|----------------|-----------------|--------------------|
| 22     | S1805      | A              | III-9           |                    |
| 22     | S1718      | A              | IV-4            |                    |
| 22     | S1719      | A              | IV-5            |                    |
| 22     | S1812      | A              | IV-7            |                    |
| 22     | S1717      | A              | IV-8            |                    |
| 22     | S1803      | A              | IV-10           |                    |
| 22     | S1763      | A              | IV-13           |                    |
| 22     | NMD347     | A              | V-1             |                    |
