# Supplementary material for: Intronic ATTTC repeat expansions in STARD7 in familial adult myoclonic epilepsy linked to chromosome 2
Source: PubMed Central journal article supplement (PMC6820779; doi:10.1038/s41467-019-12671-y), 2019-10-29
Supplement: 41467_2019_12671_MOESM3_ESM.pdf [file 41467_2019_12671_MOESM3_ESM.pdf]

**#PacBio SMRT read from Family 1 IV-98**

>m54086\_190222\_190928/13828584/ccs

CCCTAAATCGAACACAAGCAATAGGGAGAAACAAAGCCATTATAAGGTGAAGTGGAACTAAA  
ACCAGCAGCCACTAGCATCAATATCTATACTCTCAGTGGAGATTTAGCTTAAAAAGATAAAA  
AATAAACACAAAACACCTCATTAGGCTGAAATAAATATTCTTTTCAAAGAAAGGTCACAGAA  
TTTTAAAGAAGGCAGACAGCATGAGTCCAATCTTCCCATTACTCTGGCAAGGAAGCAGAAAT  
CCAGAAAAGTTTCCATCCAGTGCTCTGCCCCTGTAGTAAAATGTTGACAGGAGGTACTCGC  
TCTAGTTCCTGAAGAATGCTACTGATACAGGCTAATGCGTCAGTGGCTATGATTCTTTTAAAC  
TATCTCTCAGATAAGAGGGAACCAATGGATTGCCACTACTTTGTCCTTGGGGAACCTCCAGG  
TACATCACCTACGTCAGGAGTTCCCAAAAAATGGTTCCAGACCAGTAGCATCAGACTCCCC  
CGAGCGAGAACTGTTCCCTAGCGCCACACCCCTCCTCCCTAGTTCAGGTAAGACATCCCTTG  
AGAAAATTCACAGCCATGACATGTTATCTCTTGGATGAGGTAAAACCTCACCTCATCAATG  
ACTTGTGGGGACGGATAACCATTTGGGATTCATATGATCTGACCTGACGAATTCTGGAGAC  
TCTGGCACACTCGGATGCTCCACAGCACTGGTAAGGAGGAAAGGAGAAGCAAACCTCTTAGTA  
ATGTCTATATATAAAAACAACAGGAGAGCTAAGTTAAGGGGAAGGCCTAAAAAGCTGGCTCTG  
ATATTTTTTAAATACACAAAACAAGGAGTCACTAAGATGAATAAATACAACTAAGTTCTAAA  
AATGAAGCGAAGGCCAGACGTGGTGGCTCATGCCTGTAATCCCAACACTGGGAAGCCAAGGA  
AGGAAGATCACTTGAGGCCAGGAGTCCAAGACCAGCCTGGACCACACTGTGAAACCTGCGT  
CTACAACAAACAATGAATTAATTAATAATGAAGTGAGTTCCTTTGGTAAATTTACGGCTCA  
CTAGGCTGTGGGTCAAAAACAACAGCACTTCTTTTGATTACCAACATTAAGAACCCAAAA  
AACAGTTTAACTAAAAGCTTGTATCTCTCCATTCTTTCTAGACAGTCAGAGTCCCTCATCTT  
CTAGCCTGGATGGAAGGGGCCTGGCTGCAGGGAAGCCTGTGGGAGACTCATAGGACACTAA  
GAATATACAACTCAGGTACGTAGGAATGAAGGCCACAGCTAAAGGAACCTCGGCAACAGCCA  
CAGGCAGCCATACATACCGCGACACCAACACCATCATGTTGTTTTCTGATCCACACTATAC  
CGCCGAACATAAACATAATCCCCTGAGTACATTGGATACTAAAGAAATGGAGGGGCAGGATT  
AGTGTCTGCATCACACAAACCTGGACAGAAATAAATCAGAAAGTAAAAATACTCACAGGA  
AAATGGGTTACCCAGTGAAGAACCTCGGAACCACTAACCACATCCCTCTCGATCACCTCCAG  
CTTGATTACCAGGGCATCCCATTTTTTTCTATACTCTGTGTCCAGCTGCAGAAAGAGAAAAG  
ACCATGAATACCCAAGAAGACCCAAAAACAATAATGCAGAAAGCTTTCCAGATGCTTTGGTCT  
CTGATCCAAGAATCTTATTACAAGGAGAGAGTAATCTGACCTAACAGACAGTGCCAGAGTGT  
GAGAGACATGGCTGTGTTTTACTACAGATGTTTCTTTCAAATCACCTTATACAGGCTAATG  
TCATTACACTGAATGTGAATCTTCATTAGACAAACCAAGGAAAAGTGTAAACAAAATATTTAA  
TAGACACATCTGGGGAAAATAATATATAGTGATATGAATGTGTAAGGGTAAGACAATTTCTAA  
AAAGTTTTAAACAACAAAAGTCCAAAAGTATTAAGTAGACACTTCACACACAAAATGCAA  
GCAGCATATTTTTTTAAATTTCTGGCATCACTAGTAAGTGAAGATTTTCAACTAAGACAGA  
TATACCATATACATAAAAACCAAAAATTTCACTACAAATTAACAAGATCCAGTACCTCAGG  
GAAAGTGCCTTGCACGTTAGAGTGAGTGTTATAACCAACGAAGTAGTTATCGGAAGTCAGC  
AAAACAATGAAAATCCAGAAAGAAAAAATTTTGTCTAGAACTCTGGGCGATCCCACCT  
CCCTGTTTCATTTTTTAAACCATCTTCCCCTACAAGGAGGAAAGCAGTCTTTGAACAGATAC  
TCTTCATCTTTATGAAATAAACATTGGGCCAACACAGTGACTCACACCTGTAATCCCGGCAC  
TTTGGGAGGCAAAGGCAGGAGGATCACTAGAGCCCAGGGAGTTCAAGACCAGCCTAGGAGAC  
ATAGGGAGACCCTGTCTCTAAGAAAAAATTTTAATTAGCCAAGTGTGGTGGCGCATGCC  
TGTAGGCCTGGAAGCTGAGGTGGGAGGATCACTTGAGTCCAGGAAACAAAGGCTGCAGCAAG  
ACATGATCACACCACTGTACTCCAGCCTGGGTAACACAGCAGGACCCTGTCTCAGGGAGAGG  
AAAGAAAAAATAACCTCCACTATGGAAATGTTCTTGATTTGAGGTTAAACCAGATGTGAC  
AACTAAATATAATCCTATCTGTACTGAAGTGGGAAAATGCTATAAAGGACATTGAGTCAACT  
GATAAACTGATAAATACAAACAGAGGACTACATGAAAGTGTTCCATCAGTGTTAAATTTAC  
TAATTTCAAATAATGGTATCATGATTAGTTAAGAAATACGGCATATGGCTAGTTTTAGGAAA  
TACACACTGGAAGAATTTAGGAGTAAAGGGACTATGATGTATGTAACCTTACTCTTAAGTTGT  
TTGGGGAAAAAACAATAAAGCCTCATAAAATACATTAAGTATTCATATCCATTCCTCTAT





TTCTGGACATTTCAAGTAAATGGAATCATATGATATGTAGCTTTTGTGTTGAGCTTCTTTCA  
CTTAGCATACTTTCAAGTTCAACCATGCTGTACTTTATTCCTTTTTATAGCTGAATAATATT  
CCATTGTATGGATAGATCCCATTTTTGTTTATCCATTCATCAAATAAAATTTGTTTCCACTAT  
TTTAATTATAGTGCTATTATAATAGCACTATATTATATTACTGCTATTATAAATACTGCTGGC  
CGGACGTAGTGACTCATGCCTATAATCCTAGCACTTCGGGAGGCCAAGGTGGGTGGATCACT  
CTGAGGTTGAGTTCGAGACCCAGCCTGGCCAACATGGCAAAAACCCCATTTCTACTAAAAATA  
CAAAAATTAGCCAGGTGTGATGGCAGGAGCCTGGAATCCCAACTACTTGGGAGGCTGAGACA  
GGAGAATTGCTTGAACCCAGGAGGTGGAGGTTGCAGTGAGCCAAGATTGCACCACTTCACTC  
CAGCCTGGGCGAAAGACAAAACGTCTCAAAAAAAAAAAAAAAAAAGAATACTGCTATGGGACATT  
TGTGTACAAATCTTCATATAGACATGTTTTCAATTCTCTTGGTAGATTCCCTAGGAGGCAGAT  
TTGATGGATCATGGTAACTATGCTTAACTTTTTAAGCAACTGCCAAAATGTTTTCCAAACAA  
TTACACTATTTTATATTCACATCAGCAATGTTTGAGGATTCTAACTGCTCCACATCCTTGGT  
TCCAATTGCCCACTTGTTATTGTCCATCTTTGTTATTCCAGCCAACCTTAGTGGGTGTGAAA  
TGGTATCTCATTGCGTCTTGACTGGTATTTCCCTAACCTTTTCATGTGCTTATACTAGTCTT  
GATAGTATCCTTCATGCCATAAAAAGTTTTTAATTTTGATGTTTATTTTTTCTTTGATTGCT  
TGTTTTTGGTGTTTATAGCCAAGAACCCTGCCTAATCCAAGGTCATAAGAACTTATGCCTA  
TATTTTCTTCTAAGAGTTTTTAGAATTTTAGCTTACATTAGGTCTTTACCCCATTTCAAGTT  
AATGTTTGTGTATGATAATGAGGTAGGAGTCTAACTCATTCTTTTGCATCTGCTTCTCCAG  
GTGACCCAGTGTCAATTTGTGAAAAGCCTATTCCTTCCCAGTA

**#Oxford Nanopore read from Family 1 IV-98**

>57c288c8-ae09-4030-b991-3e8e01bd1b03  
runid=250c0471202951dfd47a182eee143db3c1b23211  
sampleid=LLAAB034003 read=2270 ch=85 start\_time=2018-03-  
21T22:01:23Z

GTTGTACTTCGTTTCGGTTACGTATTATTGCTTGGCATAGAAGAAGAAAAACATAGGAGAAAA  
TATTTATATCTTAGACAGACAAAGTTTTCTTAGAAACACAAAAAGCACAGGCAGGGTGCAG  
TGGCTTACACCTGTAATCCCAGCACTTTGGGAGGCCGAGGTGGGCAGATCATGAGATCAGGA  
GATCGAGACCATCTGGCCAACATGGTCGAAACCTGTCTCTACTAAAAATATAAAAAATTAG  
CTGGGTGTGAGTGGCATGTGCCTGTAATCCCAGCTACTCAGGAAAACCTGAGGCACGAGAATC  
ATTTGAACCCAGGAGGTGGAGGTTGGTAGAGCTGAAGATTTGCACTGCACTCCAGCCTGGCA  
ACAGAGCGGAGGCTCATCTCAAAAAAGAAAGAAAAAATCACACACACAAAATACAAACAA  
TTGATAAAGCTGAACTTTGTCCAAAAATTTAAACCTTTTTTACTCTTTGAAAGACACCTTAAA  
AAACAGGGCCTGCTGGATGCAGTGACTCACACCTATAATCCAACACTTTGGGAGGCCAGGCC  
ACGAATCAGGGTCCAGAAGACCAGACTGGCCAACACAGGTGAAGCCCCATCTCTACTAAAA  
TACAAGTGAATCATGGTGTAGATTTTACGCCTGTAGTCCAGCTACTCAGGGAGGCTGAGG  
CAGGACAATCCTCTTGAACCTGGGAGGCAGAGGTTTGGCGGGTATGGCCGAGATCTATTGCC  
ACTGCACTCCAGCCTGGGCACGCGGGATCGAGACTCCATCTCATGCAAACAAAACAAAACAA  
CAACAACAAAAGGCAAGCCACAGACAGGGAAGAAAAATATTATAACACATATATCAGACAA  
ATGAGTACACATCTACACATCTAAAAATATAAATACACAACCTCAACAATAAAATGACAAAT  
CGATTTTTAACTGAGTGACGGTTTTGTCAACCATTCCCTCCAAAAGAAGATATGCAAATGGCA  
ATAAGCACATGAAAAGATGCTCAACGTCATTGAATATTTAGAGAAATGCAATTCAAACCA  
CAATGGGAGATAACTTATTTACACACATATGGGGATGGCTGAATAAGAACAACAAATGTTG  
TTGGAGGATGTGAAGAAGATTGAAACCTCACAACTGCTGGTGTGAAGCGTGAAATGGTGT  
AGCTGCTTTGAAAATAGTTTGTGAGTATTCCCTCAAAAAGTTAAACATCCATTAACCATGTTA  
CAGGTAGTTAGACAGGCGTGAGCAGGAAGAAGGGACTCTCTCAGCCCACTAAGTGTGGTTA  
TTGGTTGACAGTTATTGCATTGCCTCTCTAACGGTGATAAATTTGGCAGCTGGTGCAGGAGA  
GCTATTTCTGATGGACCCACACCTGTTGCTAACGTATTAATTAATGGGTGCCAGGGAGAAGT  
AACTTCCAGGCATAGCCATTAAGAACAAAATGATGGACGCCTGGGGGCACCCACCAGAAAAG  
GGAAGAAAGCCTCAGATGGGCATACACACAGCACCCCTCAACCACTACCCTAGCTCACTTCCC  
AAGGGTAGGGCACTGCGCATGCGAAGCCACCTGAGAAGAATCATGGAAAGGGGCACAAGAC

AGCCATAAGGTGGGCCAGCTATAAAGTCCTAGGATCGGGTTAAACATCACACTTGTTCTTTA  
GGGTTTCAGCTTAAGGCCTCTTCCAAGCTTTAACTTTCCCTTCTCTTTCCCTGTTTTAAAGGC  
TTCTTAGAATAAACTTCCATTTCTGCTCCTGAGAATTGCCTTGATCTCTTTTTCTGCCCTC  
AGTCGAATTATTTCTTCTGAGGAGGCAAGAGTGTGAGGTTGCTGCAGACCCTTACAGATTTG  
CCAGTGCTCTGATACCTCACCAGTAATAACCATATGACCTTAGCAATCCCCTCTACTTAT  
ACCCAAAGAAGAGGTAACATATGTCTACAGAAGTGTACACGAGGTGTTTCATCAATGGTAT  
TATTCATAATACTTAAGAAGTAAAAACAACCTTTAAATGCCTATATGTGAATGAATGGACA  
AAAATGTGAACAATGTATACAACAGAATACGCCCGTGTATTCAGCCCAGTGGCTCACGCCTA  
TAATACCAATATTTGGGAAGCTGAAGCAGACAGATAACTTGAGGCCAGGAGTTCAAGACCAG  
CCTAAAGGAACATGGGTGAGCTTCTCAGCTACTAAAAATACAAAAATTAGCCAGGCGTGGTG  
GGTGCATGCCTGTAATCCAGCTACTGGAGGCTGAGGCATAAGAATCACTTGAACCCAAGGC  
AGAGGTTACTTGAGTGGAAAGCCAAGACTGTTGCCGCTGTACTCAGCCTGGATGACACAGCG  
GAACTCTATCAAAAAAAGTATTCATATAAGGGAATGAAGCATGTATCAGTAGATACATGCT  
ATAATATGGATGAACCTGAAAATCTAAAAATGAAAGAATCAGTCACAAGAGATATACATCA  
TTATGACTCTTTCTGTATAGAGAAATGTCCCAAATGAGCAAATTCATAGAGACAGACGGTA  
GATTAGTGGCTGCCAGGGGCTGGGGAGAAGGTAAAGAAATTTGTGGTTTATAATGAATCTGAA  
TTTTTTCACAAGGGGTAATGAAAATGTTTTGGAAATTAGGTCATGGTGATGGTTTATAACCGT  
ATAAATGTGCTTAAAACCACTGGTGTATATATCTTAATTTTTGGAAAAATAGAAATACTCG  
TGTCAAGACAAACAACCCAATACAAAATGAGCAAAGATTTCCAAATGACACTTCACAGGAGG  
AAGAAGTTTTATGACCACCAATAACCACATAAAAAGATGCTAAACATCATTAATCACTGAGG  
AGATGCAAATTAAGCCATAATGAGAGAAGACAGATCACAAAACATTTTGGCAAGGAGATGG  
AACGAAAACCTAGAACTCTTATACACTGCTCACTTAGGAATATAGACAGGCAACCACCTTTGG  
AAAACAGTTTTGGCAGTTACTTTAAAATATTTGAGGCCGGGCACAGTGGCTTGTGCACCTTTA  
ATCCCAGCACTTTGGGAGGCCAGGCGGGTAGATCACCTGAGGTCAGGGGTTCAAGACCAGCC  
TGGCCCAGATGGTGAAAACCCCATCTCTACTAAAAAATCACGAATTAGCGGGGTGTGTTGG  
TTGCATGCCATGTAATCCAGCTACTTGGAGGTTGAAGGCAGGAGAATCACTTGAACCCAGA  
GGCGGAGGTTGCAGTGTGACCGAGATCAGCCACTGCTACAGCCTAGGCAACCTGGCGAGAC  
CTGATCTCTAAGCTAAATAATAAATAAATATTTGAACCTTACTTTTACCATGACTCAGGCAT  
TTCATTCCTCAGTATTTGCATAAAAACCTAAATATGTTACACAAGACTTGGCCTGAGAAATG  
TTTTACAGCAGCTCTGCTCTACAATCCTCCCAAACCTGGTAACAACCTCCGTCATTCCTCCAAC  
AGGTACATGAGTGAACAAATTATTAATTTTTGTCAAATTTCAATTGGAATAATACTCCCAAG  
CCATGGGGGGTGAACACTGATAAACACAACATGAGCGATCATAGAATCATTATGCTGAATT  
CAGAAATGCATAAGCCACACTACAACACACTCTAAAATTTCTATTTATATAAAACTCTATAAA  
ATGCAGACTATTCTATGGTGGGTATGCTCAGCCAGCAAGGGCAGGGGAAGACTTGCAAGGG  
GTATAAAAGGGAAACTTTTTGTGGGTGATGAAATGTTCAATTATCTTCTAGTATTGATGATGAC  
ATCACAGGTATATCACATGTGAAAATTTCTCGGGTTGTTGCATTTATTTAAATGGAATTTAA  
GTAAAAAATTTATTAGATTTGTGCATTTTAAAGTACATACGGCTTACTGTACTTTGATTATAC  
TCAAACAAAGTCAATGAATAAAAACCTACTTAATAAAAGAGTGGGGACCTGAGTACAAAGATG  
ACGGTGGACACCCCCTGAACCCAATATACACGTGACAACAAAGAAGGGGTGAAGCAAAGGCA  
AACCCCACAATCAAGGAGAAGAAACAGAAACATTTTTGGAAAGATTGGAGAGGAAGGTATATG  
GATCCAAATGTGATAAAGTAGTCAACTGATTCTAACCAGTGGTGAGGAATGATTGAAACAAT  
CCAGTTTGCAGGTGGATACCCAAAAGGCTCAGGCTCTGGTGAGGTACCATGTTGGGTGAAGA  
GAAGGGATAGACTAAGAACCAGCTGAAGGTTTGGTAACAATAGCCAGCCTACCCTATAATGA  
GGTCATGGCGACCACATCTCACATGCTGAGAACCCCGTCTGAGAAATTTCTGTAGAACCAACA  
ATAACAGCCAAATATCTCAATCACAAGAGGCCACTAAGGAAAAAAGTAACTTGGAAACATC  
GTGGAAAGCATAAAAATCACTCCCTCTAACATCATCCTCAGGGAAGATACTGTGCCACCATA  
TAAGCGCAGAACAGTTGCCACAAAGAAGAGCAAACACTCAGAAAAATAGGTCTCCAGTTTATT  
AAAAATAAGAAAGCAGAATTTAAAACCTCAATATCAGGCTGGAGGTGGTAAAACCTGTAATC  
CCAGCACTTTGGGAGGCCGGGTGGGTGGATCACTTGAGGTGGGTTCAAGACCAGCCTAGCAA  
GCCCTATATAGTGAGAAACCCGTCTAAAACACAAAAAATATGGCCAGGTGCAATTTGGCTCA  
CGCCTGTAATCCTAGCACTTTTTGGAGGCCGGGGCGGGCGGATCACGAGGTCAGGAGATCGA

GACCATCACAGCTAACACGGTGAAACCTCTCTACTAAAAAATAAAAAATTAGCCAGGTGTG  
GTGGCAGGCTCCTGTAGTCCGCTACTCGGGAGGCTGAAGGCAGAGATAAGCATGAAGCCTGG  
GAGGCGGAGCTTTGCTGCTTGAGCGAGATCACGGAACTGCACTCAAGCCTGGGCAACAGCG  
ACAAAGACTCCGTCTCAAACTTACAAGTGTGAGCGCGCCTGTAATCCCAACCAACTCGGGA  
GGCTGAGACAGGAGAATCGCTTGAACCTGGAGCCCAGACCCGCGAGGAATTGAAATCTTACC  
ACACCTGCTGCAGCAGCAGAGATCCCAATTGCCAGAGAGGGTGCCAGAGTGGTTTTGTTTTAT  
TTTGT TTTGTTTTTTGTTTTGTTTTGTTTTGTTTTGTTTTGAGACAGACCTTGCTCCGTCACC  
AGGCTGGAGTACGAGTGGCTGTCTGGCTCACTGCAACCTCCCGGACTGGCGATTCTCTGCCT  
CAGCCTCGAACTGGGACTACAGGCGTGCGCACCACCACCACACCCAGCTGGACACTGTATTG  
TTGAGTGGAGATAGGGTCTCGCGATGTTACTAGGCTGATATCAACTCCTGGTCTCAGTGCTC  
CACCTATCTAGGCCTCCCAACTGCTGGGATTACAGGCGTGAGCCACCCGCGCCAGCCGAGGG  
TGGTTGAGTGGGTAAGGACACAACAGGGCCAGGCAGAGTAGGTGCCTGTAGTCCCAGATACT  
CAGGGGTGAGGCAGGAGAATCGCTTGAATGCGGGAAGCAGAGGTTGCAGTGAGCCGAGATCG  
AGCCATGCACTCCAACCTGGGAGACAGAGGTGAGACTCCATCTCAAACACACACACACACAC  
ACACACACACTCCACCCAAGCCATAAGACAGGGGTGAGACCCCATCTCAAAGCAAACATA  
CACACACACAACCACAACCCTGGGAGACAGGTGAGACTCCATCTCAAAGCACACACACAGAG  
AGAGAGAGAGAGAGAGAAAGAACCCTGGGAGACAGGTGAGACTCCATCTCAAACAAACACA  
CACACACAAAACCCTGGGAGGTGAGACTTGAATATAAAAAACAAAAAACACACACACACAAC  
CACAATCACCAGAGACAGAACCATCTCCAAAAACAAAAACACACACATACACAACCACAAC  
AACTAAATAAATGAAAAACCAAAGTACTGGCTCTAGGAAAACAAAGACATGATTTGCTGA  
AAACAGTGTAGTGTCTTGCTGTGATATTTCCATACTCGTATGCTGTAATGCTAAATAATA  
CTGGCAACTAATTCAGGTATAATTAGAGTACTCTGGGACAAAGGGGATAAAGGGGAGACAGGA  
GGGAAGGAAGAGCTAAGTCATTGCGAGGGAGGTCAAGGATGGGAAGAAAAAGCAAATCTT  
CATATAACTTTAAAATGACTTTTCGAAAATGAGAATAAACACATTATTTAGAGACCTAGA  
GATAAATATCAAATATAATAACAGGGAGAGGGATTTAGAACTGGCTGTCCCTGAGAGAGGG  
GAGATGGTGGAGGTTTTACCAATAAACTTTAAGAACGATTTGACTTTTTTTTTTTTTTTGGA  
GCTGAGGTCTCTTGTCTGGGTTCATGGTGCCATCTTGGCTCTGCAACCTCCGCTCCCTGA  
TTCAAACCTCCGGAGTAGCTGGGGTTACAGGTGGCATAAGCCATAGTACTTCGACCGCAA  
CTTTTCCAACCTATCTTTAAATATCTTTGGATCATCCATGGTTTTTTAGTTTTTTGGGTTTTAGA  
TGGAGTCTTGCTGTATTTGCCAGGCTGTAGGCCGGCAGTGCGACCTCAGCTCACCTGCAAT  
CTCTTCCCTCCCGGTTTCCAGCCGATTCTCTCGTGCCCTCAGCCTCAGTAGCTGGGATTACAGGC  
GTGTGTGCCACCACGCCAGTTTAATTTTGTATTTTTTAGTAGAGAATACTAAGAGTGCTGAG  
ATTACAGGCGTGAACAACGATGCTCAGCCGAAAAATGTGCAGTACAAATACCAAATTGGAGA  
GAAAAATACACTGATGCTCTGGGTTTGGTACAGATTGCAATAATTTTTTTTCTTTATATTTT  
TATGTAAAAATACTTAAGTTAGGCCAGGCGCAATGGCTCATCACCTGTAATCCCGGAACTT  
TTTGGGAGGCCAAAGAGGTGGGTGGATCACCTGAGGTGAGGTTCAAGACCAGCTGGCGGC  
ATGGGCCAAAATGTCTCTACTAAAATAAGAAGTGCGGCGTGTTGGTGTGCTACAGTCAGCTA  
CTGGGAGGCTGAGGCAATGAACCTGAAATAGTGAATTGCAGTGAGCCACTCTGCCTCCAGCC  
TGGGTGATAGAGTGAGACTCCGTCTCAAAAAAAAAAAGAAATGCATAGAGTGCAATTATCTTT  
TAGCCTCTTAATTAATACTGAAAACAAAAAGAATATGAAGGCAAGTCAAAGGGTATCCAGA  
ACATTCTGGGTGATGAACCAACAGGCCGCTGGTGTAACTAATTCGAGACAGTTGGTCTCAGG  
AACAGGTCACAAGCTCACCCAGTCTACTCTGTCTTACTACACAGGACTGAGGCTTTGCG  
TAGTTCTCGATGCTGGGCTGTGCAATTATCATCAAAACCCAGGGTTGTCCCAGCTGCTTT  
TATAATTCCTTTGAAAGGTCTAAGCACACAGTGGGCCTCAATAAGTCTTGCTGATTATCA  
CCCCATCACACCTTCTTTCTTAGGCACAGAAATACAGAGAGAAGCAATAATGGGTTTCATAGG  
GGGTGGAGGGAATCATAACAGGAGCATTGGAACCATCCAGACAGCTGGATCCTCAGTGGCCT  
GGCAGTCTGGCTCCTTCCGGGTGTAGCTTCTTAGGCTGAACACGGACTGGCCTCCAGGAGC  
AGGGAGGGTGATGAGAGAGAAAAGGCAGCTCATCCAAGCTGCTGTCTAGTTATCCCCATCTG  
TCCATCTGTCTCCTCAGCAAACACATTCTTGGAGTACCACCTGGAGCCTGTGACTCTCCCA  
GTTATCTCAGGGACAAACCCTTGGCTCCTCTTCCACTGGTGCACCTACAGTACCTAACCTGC  
TGAAACTGTGGTCATCTGACCCCTTCTCTCTTTTCATTTCATAGGACGAGATGTAATCAAG

GCTCTGAGGACGATGGTGCCCATATGATATCCACATTGAACTGTTCGGTTGTCAGGGCGCTAA  
ATCGCTGTAGCCACGGGCAGGCTATGAACTCTAGTGGGTGGCACAGCCTGCCCCCTGCTGCT  
CAACATGGAAGCTGCAGGGATAGGTGACCCCTAGCCAGGCTGGAGTCTTTATGGACTCTACT  
GGGACAGTGGCCTCCAGACACCGGTTTTGAAAATTCATCTCTTAAATTGAGTTCTCCTGCCA  
GATCTCCCCTTGTTCCTGGAATTGAATTGTATCCTCTAAAATTCATATGTTGAAGGGTCTAA  
TCCCCAGTATCTCAGAATGTGTGACCCTATTTGGAGATAGAGGGTGTACAGATACAGTTAG  
ATCAAGTCATAATGAAGTAGTGTGGTCCCAATGCAATATGACTGGTGTCTTATTTAAAAGGA  
AATGGGCAACACGTGCATGCAGGGAACACAAAGGCAGGGACTGGGATTTGATGCAGCTCACA  
CGCCAGCAACCACAAAAGCTGGGACAGAGTTCTAGAACATTCTCCCTCACTGCCCTCAGAA  
GAAATTGAAAGCCCTGCTCACACCTTGCTTTGGACTTCCAGCCTCCAAAATGTGAGACAATA  
AATTTTTATTGTTTAAGCCACTCAGTTTGTGGCACTTTGTTGCAACAGCTGATTATGAGCCA  
AACTAATACACTCCTCGTCAGGGTGTCTTAGTCTGGGTTCGGAATTGTTTTAAAGGCTTAC  
GGCATGCATATTATGGTCTAAAGATTTCTCCGAAAATATAAAAATTACACAGTGGAATGGA  
AAATGCATTGGATCCCAGAAGACCAGGTTCTAGACCAGGGAAGAGCTGTGTGACTTGGAAACA  
AATGCTAAGCTCTGAGCATCGTTTTATAAATGAAAGATCTGTGCCTGATGCCCTCTAAGGGTG  
CCTTTTCAGCATTAACTACATTTGTTTTAAATATTGGGCTCCAATCCTGTCTAGGAAATGCA  
AACTGAAATATACACACATACCTGAACAGTCCCAAGCCCCAAAGCAGAGAAGTTGTTTTAAG  
AAAAAAAAAGATTTAAAAATAACAAAGTAAAGACCGGGTGCTGTGGCTCCACACCTGTAATC  
CCAGCACTTTGGGAGGCTGAGGCAGAGGCGGATCACCTGAGGTGCAGGAGTTCAAGACCGGC  
CTGGACAACATGGTGAACCATATCTCTCTACTAAAATACTCTTAAATTAGCTGGGCATGG  
TGGCATGCACCTATAGCCCCAGCTACTCAAACCTGAGGCAGGAGCATTGCTTGAACCTGGG  
GTCAGAAGTTGCAGTGAGCCAAGATCGTGCCATTGAACTCCAGCCTAGGCAACAGAACCCAA  
GACTCAATAAAACAAAACAAAAGCAAAACAAAACATAATTCATGAGAGCTTGCTTTAAGAAG  
CAGAAGGTGGTAAATTGGAATAAATAAAGCAGAATGCCCTGCATGATCTTACGAAACCCT  
GTGTGATTGGGCTTCCATGTGTTTTAGCTTACGGTGGAGATGACCTGGTGGGAGCTAGCAAT  
TTGACTCATCCCTGCCAGCATGTATTTCTTGACTGCTAAATGTGTCTTTCTCTTGGGAGCC  
TGGTTTAGACACTGGTTCAACCAACTCTGAACACTTGACATGAATTTGGGTTCCCAGCCCAC  
AAGAGACTGAGGTGCAGCTCTGGGACACAGAAATGCACACAGCTGACCACTCCCGGAGTCAC  
CTGGGGACACCCAGCCTGCCACAAAAGTTTTATTCTGTCTCTACTTTTTTTTTTTTGGAGCG  
AGTCTCACTCTGTTCGCCAGGCTGGAGTGCAGGTGGCGATCTCGGCTCACCTACAACCTCCGC  
CTCCAGGTTTCGCGATTCTCCTGCCTCAGCCTCCCAATGCTTTAGAACCACAGGTGCCTTTTC  
CTGAAACTTAGCTAATTTTTGTATTTTGTAGAGACAGGTTTCTCCATGTTGGCCAGGCTTG  
TTTGAACCTCTGACCTCAAGAGTGATTTCGCTCGGCCTCCCAAAAATGCTGGGATTACAGGTG  
AACACCATGCAGCCCACTTCTGTATCTTCTGTATCTTCTGATGGAAAGGGAAGATTGAACAC  
ATCGGAAAAAAGGAACTGGATACCAAAACGGTTCTTCTCCTCTCCCATCACCTAACTT  
TCCAAATGAATCCTGACCTCCAGATGTGAGGTCTAGCCCAGGCAACTACAATCACTTAGGTA  
TGGGGAAATGGAAGTGTGCCAGATACTTAATAATTTAATCTAGACAATGCTTGTGTTTCCA  
AGCAAGAGAGAGCAAGAAATTAGCTAACAAAATGTCAGACACAAGACAGGTTAAGAGGTA  
AAACAGAAAGGTGTAAGAAAGAAAAAACACACACTTACAAATAAGGGCAGGGGACAGAAAG  
TTAGGATCTAAAGAAATGGAACCCAAAAAATACAAATTTCTGTAGGGCGTAGTGGCTCCCA  
CCTCTATCATGCTTACTTTGGGGCTGGGCGAAACGGAATTCACAGGGGACCAGGAGATCAAG  
ACCATCCTGGCCAACATGGTGAACCCCGTCTCTACTAAAATACAAAATTAGCCAGGTGTG  
GTGGCACACACCTGTATTTCCCACTACTTGGGAGGCTGAGACAGGAGAATCGCTTGAACCCG  
GAGGCGGAGGTTGCAGTGAAGAGGTGAGATCGCACCCTGCACTTCCAACCTGGCAACAGA  
GGCGAGACTCTGTCTCAAAAAACAAAAGCATGCCTGAGGTCTTATTCAGGACACTGAGGCCA  
AGCAGATTTCTCAGAGGGTCTCAACAAGGACTAAATGTCCTAAATTCCTGAAGAAGAGGCA  
CCGCTGATTGGAGATGGGCAAAGGCTATTGGGGTTTTCAAAGGGATGAATTACAGGCCAAT  
TGGCTTGATGTCGATGCCAAATAATTTCTACATCTGAGTTCTAGACTACTGAAAGTTCTCTAA  
ACATCTACACAAGCGATTTTTTCCCTTTTTTAAGTGAACCATTTGGTCTTTGAAGTGATTCA  
TTTTAAAGTTATTTTTCAGCTATAATTTGGCAAGACTCCCAGCTGTCCTCCATTTCCATTCTCC  
CTTTCTTGCCCAACAAATCACCTCTGAATTTTAACTGGGCACATAGCTGTAAAATATAAAT

ATTTCCCAGCAGCTGGTGTTCACCTTCTGAAAGTGTGAGCCATTGGCGCGGTAAAAATGGAA  
AGTGTCTTCAAAGGCAGGGCCATCCACTTCTCCCTTGTTCCCTCCCCTGGTGGAACAGAC  
GTGATGACTGGAGGTGGAGCCTGGTCTAACAGAACTGGGAACACAGACACTGTCCCTTCCTG  
GGGATGTACCTTCCGGGAACAGAAAGGAGTCTAGCCTGGGCTCTGCATTTGGAAGGGCATTG  
ACAACTCTATTACCAAAGCATTAAATCGGAGAAAAGACCAGTGAGAATGTATGGAGTGCTAT  
GTCCTGGACACCAGTCTAAGTACTTTACATATTATTATGTAATCTTCACAGTAACGCCACAA  
GGTGGAGGTACTCATTTCCTTTTTACAGATGAGAAAAGGTTTCATTAACCTTGTTCCAAGTCAC  
ACAACCTTTGACTCTAGCTACAGGGTCTATTATTTTGAACCCCTTACCTAGGTGCTTCTCG  
ACTTTACTGCACATTGAGTCTTAGAAAACCTTTAAAAAACAGGTCTTGGGTCCCCTCAGGTCT  
GATGCAACTGTGTTACCTTGGTGGTGGCTGTATGGAGAAGACAGCAGGAGCCACCAGGACC  
AGGAGGACTGCCCAGCAGAAGCTATCCTTACCAGTCTTGACTATTTCTCCTAAGAATCAA  
GGGTAAATTTGTTTCAGCCACATGGTAGCCTCTCTATTCTCAAGGCTAAACATAATCCTAA  
ACTCCCATACACAGCAGAATTTTAGATATGACAAAATGCATTTACTGAAAAGCTTGTTTACA  
TATTACTTTTTTTTTTTTTTCGAGACGGGTTTTGCTCTTTGTTGCTCAGGCTGGATGTAGTGC  
AATGGGTGCAATCTCAGCTCCTGCAACCTCCACCTCCCCGGTTCCAGGTGATTCTCCTGCC  
TCAGTCTGAGTACTGGGACTACTGGCATGCCACACCCACCCGCCGACTAAGCCTGTATT  
TTTAGTGAGAGCCCGGGTTTTAACTCCTCTTGGCCAGGCCGGGTCTCCAACTCCACAGCCT  
CAGGTGATCTGCCTGCCTTGGCTCCCAAACCTGCTGGGATTACAAGCCTGAGCCCTGCCTTCA  
GCTCACATATTCCAAACACTCAGCCTACCTTTTTTAGGTATGGTAGGCTCTTTAAAATGGATA  
ATAAGGCTGGGTGTGCGGTGGCTCACGCCTGTAATCTCCAGCACTTTGGGAGGCTGAGGCGG  
GTGGATCATGAGTTCAGGAGTTCAGACCAACATGGCCAAGATGATAAAACCCTGTCTCTAC  
TAAAAATACAAAATTTAGCTGGGCGTGGTGGCAGGTGCCTGTAATCCCAGCTACTTGGGAGG  
CTGGTGAAGAATTGCTTGAACCCGGGAGGCAGAGATGCAGTGAGCCAAGATTGAGCCATTGC  
ACTCCAGCCTGGGCGACAGAGCAAGATTCTGTGTCAAAAAAAAAAAAAAGGGTGGGGGGCAAT  
AATAAGGTCATTTATAAAATTTTATAAATTATCTGTTTAAAAATGTTTTAAAGTATGTTGGA  
GTCTACAACCAACCCTGAAGGTTATTTAAAGCAATGACGGTGGAGAGCCTGAGGCTCTTGAA  
TGATCTCTCCATCAAGTACCGCTGAGGCTTATAGGATGAGTACACTATCTGCGTATTAAGAT  
CCACTTTCATCTACGTTACTGCTTGAATTTTTAAAGGCTTTCAGACTACTAAATTAGAAATC  
ATGGTTCCTCAAATTTTATTACTTATTTTCACTTTGAGAGAAAAATATTTAGATTTCTGTCT  
ATCATGATTGGTTCAGAGACTGGTGACTTTGAAAATTTAATACCTTTGAAAACGTTATTTCA  
AGATGCTCCCCCTTTGTCCCTTCAATTACACAGTATGGTACCAGGTGGTGTACATTCACAAGA  
AGTGTCTAGAAAAATAATTCCAGATACTTACAGAAACAAGAACTCAAACAATTGAATTTGA  
AAGAGATAAAAAGTTCAAACATGCTTTATTATTATACTGGATGGAACCTAGGGTAAGAGGTGT  
AACTCTATAAAATTTATGCCTGAAAGCAAGCCTAAACCAGGCACTGTGGTGGCTCTGCACCT  
ATATTCCAGTGCTTAGGAGACAATGGGAGAAGGTACTTTGGGGCAGTTTTGAGACCAGCCTGG  
CAACATGGTGAAGCCCACCTATAAAATAATACAAAATTTATCAGGTGTGGTGGCTGGGTGC  
TGTGGTCCCAGCAGAGGTGGGAGGATTGCCTGAGCCGGGAGTTGAAGACTGCAGTAAGCCT  
TGACTCTGCGCCACTGCAATCCAGCCTGGGTGACAGGGTGGGACTCTGAAAAATAAAAAGT  
CAAGCAAGCAGGCAAGCCTAGGCCCGGGCACAGTGGCTTACACCTGTAATTCATACTTTGG  
GAGATCTGGTGGGAGGATCGCAAGTCAGGAGTTTGGAGACCAGCCTGGGCAACACAGTGAGAC  
CCCATCTCTACAGAAAAATTAGATGGGAATGGTGGAGTGCATGCCTGTGGTTTTGGTCTGGGC  
ACACTACTCAGGAGGCTGATGTGGGAGTTCACTTAAGCCCAGGAGTTCAAAACCTCACAGTGA  
GATCTGATGGCACCACAGCACTCCAGCCTGGGCACCGGCAGAGACTATCTCAAACTAAAAA  
TTTTTAAAAAGCAAGCTCATGGGGCATATGTTCTCAAGATCTCCTGAGGGCTGTGTCACTAG  
CCAAAAATAAAAAATAAATAAATAAATAAATAAATAAATAAATAAAGCAAGCTATGATCCAAGCTTT  
ATAGTCCAACCTACCCAGGAAAGAATCTGGCAGTATTATATATTAAGTTTTGAGGAAAAATA  
AAATTTAAAAACATAGGTTTTTAAAGCCATGCTGCCAGCTGTCTTTGGAGATGTTAGAGCTAG  
GTCTGCATCTGGCTGTCACCTCCTGTGTGACCCTGAGCAAAAAGAAATTACTTAACCCCTCT  
AAATGCCATCTCTTCATTTTTATAGATGAGGCACTAACTACCTTTACAGGGCTATAGGAATTA  
GATGAAGGCATGGCTTGTGGTGCCTGGCACAGTAGATGCTCAATAATGGTGGCTATTATTGG  
CTAATCCCAAACCTCAGCATAAGCCAACAGTATGACAGGAGACTTACATCAGTAGTATGGATC



TAGGAGACTGTTTGCCTCTCTAACCTATTTGTCTCCCTTACAGTCACATTCAACATTTAACA  
CTTGTTTCATGTACTTGTCTTCTTGTCTACCCCTAGGGTTTCAATGGTCTGGGAATTTGG  
GGCCCAGAGCTTTAGAGGTTGCAAAGCTTCCCCAAGTCCACCAGCCAGCTCCAAGACCACT  
TGCTCTTACATTCTATTATATGAAACACAAGGTGAAGTTACAAAAGGTAGACTACTGTTCTA  
GATGAAGAAGTGGCCAAGAGGCTGATGGCTCACGCCTGTAGTCTCCCAACAGTTTTTTGAGGC  
AGGCAGATTGGATCACTGAGGTCAGGCGTTTGAGACCAGCCTGGCTAACATGGTGAAACCCA  
TCTCTACAAAATATAAAAGTGGTTAGGGTGTGGTGGTGCAACGCTTAATCCCAGCCTTCTTT  
CGGGAGGCTGAGGCAGAAGAATTGCTTGAACCCGGAGGTGGAGGTTGCAGTGAGCTGAGATG  
GTGTGTGCACTCCAGCCTGGGTGACAGAGCAACACTCTCATCTCACAAAAAAAAGTGTAAG  
AGTCATCTAACACCTAGATGACTAATCCTTGCTTTGGGTTGGGGAGAGATATAAAGTCATTG  
GAAATTTTAATAAACTGCATTTATTAGATATTGTGGCATTGTTATTTATCTTGTGTGCTGGC  
TCATTAGGTATTGTTGGCTACACAGAACCCTGTATTATAAAAGCATGCTCCAACCTGTTTG  
AAATTTGAAATACCATGATGTTTGCATCCTACCAAAATAGTCATGACACTGTGTATATAGAA  
AGCACACACAACAGATGTTATTTTTTATAAGGGAAGATTATACCTGGCATCAGTTTCTTCGTC  
TTTTTCTATATATACATTTTTTAAAAATGAAAACCTCATACTAACACTCAGCACGGTCACC  
ACGCTGTGATAGCTAAACCCACGCTAGCTATTTAAAAGCAGCACTACTTTCTATTATTTGGT  
TCTCTGTTTCCATGAGCACTCAGTGCTGTCTCTGACATGTCTACAAACCACACATAAAA  
ACTACAAGGCCTATAGAAAATGGGTTTGGAGATTAGTGCCAATACTCAAATCTTTGTGACAC  
ATAAAGATTACCAGTTTCAAATATGTCAATGGTTAAGAAATAAACAGTCTACCTTGACCTGC  
AATTTGCGAGCAGAAACACCACTGGACAGCCCACCCAGCTCACGCATTGCCACCCCTGCATG  
AAGAGAGAGAACAAGATAAAGACAAAGTGAGAAAACATAGAAAAAGAAAGAAAGATTGGG  
CTGGGCGCGGTGAATCACGCCATAATCCCAGCACTTTGGGAGGCCAAGATGGGCAGATCACG  
AGGTCAGGAGATCAGACCATCCTGGCTAAACACGGTCGAAACCCAACTCTACTAAAAATACA  
AAAATTAACATCAGCGTGGTGGCGACACCTCATATAATCTAGCTACTTGGGAGAGGCTAGAG  
GCGGAGAAAATGGCGTGAATACCGAGAGGTGGAGCTTGCAGTCAGCTGAGATTGCGACACTG  
CACTCCAGCCTGATATGCAGAGCAAGACACTCCATCTAAAAAAGAGCTATAAAA  
ATTTGCAGACGCGGTGGCTCACACCTGTAATCCCAGCACTTTGGGAGGCCAAGGCAGGTGTA  
TCACCTGAGGTGGGTTCAAGACCCAGCCCAACCAACATGGAGAAACCCCGTCTCTACTAAA  
AACACAAAATTAGCCAGGGTGGGTTGGCGCATGCCTGTAATCCCAGCTACTCAGGGGTCTGA  
GGCAGGAGAATCGCTTGAACCAGTGGAGGTTGTGGTGGAGCCGGGTGTGCCATTCTCACACTT  
CAGCTTGGGCAACATATAGCCAACTCTGTCTCAAAAAAAGCTATAAAATTTTAGCCG  
GGCACAGTGGCTCATGCCTGTAATCCCAGCTGCTTTGGGAGGCTCAGGCGGGGATCACGAGG  
TCAGGAGTTGAGACTGGCCAACATAGTAAAAACCTGCTAAAAATACAAAAAGAAATTGGCAG  
GCGTGGTGGCGAACCTGTAATCCAACTACTTGGAGGCTGAGGCAGAGATAGCTTGAATTGGA  
GGCAGAGAGGAAGTTTACAGTGGCTAAATCGAGCCACTGTACTCCAACCCGGTCAACAGTCC  
GAGACTCTATAGAGAAAAAAAAAAAAAAAAAAGCTTTAAGAATTTTATCACTAGTGTG  
GTTTGTGTATCTAACACCACAGTTGACTGTGGTGGTAGACCAACATACTGGGGATCAGGTGT  
GTTGCTCTGGTTTGTGTTTGTGTTTGAAGTTTCGCTCGTTGCCAGGCTGGAGTGTATGGT  
GTGATCTTGGCTCACTGAAACCTCTGCCTCCCGGGTTCAAGCAAATCTCTCGCTCAAGCCTC  
TGGTATTAGCTGCGGGATTACAGAATTTGCCACTGTGTCCAGCTAATTTTTTTGTATTTTTAG  
TAGAGGCGGTTACCCATGTGCCTGGATTGGTCTCCAACCTCTCTGACCTCGGGCGATCACGC  
TCCTGCCTACCAGCTTCCCAAAGTGTCCAGAGTTGGGTGTGAACCACCTGCCTGGTCTAT  
GTGGTTTTTCTTTAAGACAGAGTCTTGTCTGTACCTGGAGAAACGGAGTGCAGTGTCTGTG  
ATCTTGGCTGCATAGCACTCTGCCTCCTGGGTTCAAGAAATCTGATTCTCCCTGCCTCAGCC  
TCCTAAATGCTTCCCTGGGATTACAGGCATACTGTTCCACACCAGCTAATTTTTTGTATTTTT  
AGAAGAGACGGGGTTTCTCTATGTTGGTCAGGCTGGTCTTGAACCTCCCGATCTCAGGTGATC  
CACCAGCCTCGGCCCGAAAGTTACAGGCATGAGTCACTCGCCCGGCCATTTCTAAATCAAT  
CTTCCATTTCTAAAAATTTTTGTCTTAAAAATGTTATAGGCCGGGCACGATTGGCTACGCC  
TGTAATCCCAACACTTTGGGAGGCCAAGGTGGGTGGATCACTTAAGGCCAGGAGTTCGAGAC  
CAGCCACAAGCTAACATGGTGTAGCCATATCTCTACTAAGCTAAGAAATTAGCCAGGTTTGG  
TGTGGCCCTGTAGTCCAGATACTAGGGAGGCTGAGACAGAAATTAAGTCCGAACCCGGAGG

TGGGGTTTGCAGTGAGCCGAGGATCTCGTCACTGGACTCCAACCTAGGCGAGAGGTGAGACT  
CCGTCTCAAACGTCGAGGTAAAACACAAATGAGGTTGAAAAGAGAATAAAAAGGAAACAGAG  
TGTGGCAAACCCAGGAATGGCGATGGAAGGGCTGCGGCTTGCAAGCATGAGATGGGGCGTGC  
GGTTCTCTGGAATCAGATGTTTTCCACACAGGGGACGTGTGCACTTGTGTGTGTTCTATG  
CAACTCAGTTCAACTGGGTGCTTTTTGTGTTCTAGTGCTACTTCCACAGGCAAAAATTACAC  
ATAAACTCATGTTATGCTCAGAGCATGCCAGCAGGACTGCCCTCCGCCAGAGCGCTGACTTG  
ACCCTCTCCTCAACCTCAACCCTAGACCTCGGGCCTGCTTCTGTCCCTCTGATTTCTACCGT  
CTCTAGCTCTAGCACTGCTTTCTCAAAGTGATCTTTTAGAAAGGATGTGGGTCAATTATAAG  
CTAGGGGAGGTAGGACATAGGTGGTTCCTATTTTCCAAAGTTCTTAAGCAGGTCCCACTTGG  
AAAGGGGCTCGTGGTCTAGGCAAGCTGTGTCAGCCACTATCTACCAGAATGAACAAGCCCTG  
CCACTTCCACCTCCCAACTCTCAGAGTAAAATGCTTTTCAACTTTGTGATCGAAAGAAATGA  
GTAAGTCAATATGCCAAGATTTTCTACCATTTGTCCAAAGACAAACACTTTTTTAATGTAA  
TCTTTATGTATTTATTCACACATTTTGACAAAATGTTACAGTTAGAGTGAAATCTATTCTAA  
TAATACAAGAGTACGCTGTACAAGACAGACCCCAAGTCTCTGGTCAAGAAATTGCCCTAAGT  
CAGAACAGCAGAACAACAACCTCTTCGCACTTGTGCGTGATAATCTGTGTTGTCATGGCCT  
TGCCACACACCTATATTCTCTCTCTCTCTTCTTGCACCACATCCCATCCACATCCCACTTA  
ATTGCAGTTCTTTGGTTTGGGCCTTAACCAGGGACTCTACTGACTACCATGGGTCTAGAAA  
GAAGAAGTAATAAATGAAAAATAACTGGGACCTTCGATGCATCTCTCCTCTTCCAACAATG  
ACGAAGAGGCAAGACATACTGCTGGAGACAAGCTACTTCTTGGCACAAAAATGAACAGGCA  
ATAAGAGGTCAAGGGAAGTGTTTAAGTTGGTCTCAGGTTTAAACCACTTTTCAACACCCACA  
AAACAGTAGCAAGCAGGGAAAAAAAAGCAAAAACAAAAACAAAAACTCCCAACACCTCAAG  
ACTCCAGAAAAAAAAGGGAGGAGGAGGATTTAAAACCTTGATCCTAACTATTCTAACAAAT  
TGCAGCATGACCATAAACAAAACCAGCTCGGTCAAACCTGACGGCAATCCGTTGTTGATATAT  
CGCAAAGACAGTGTGGTTCACTTTTTATTTTTGGCTCTGAAGAGGGAAGAAAAACTTTTTGGGG  
GGAACTTAATGGTACAACATAAATAAATCTCCACTGTGTGGTATTTGAGACAAGATTACATC  
TATGCATTCACACAGCTTGTCTGTAGATCTGCTGAGAGCTCCAAGGGAGTGGCCCAGCCCCA  
TTCCTCTGACTTAGCCTTCTGAAAAAGACAAGTCAAACCTGATATGAAAAATAATGCCTGAA  
TCAAAATGGTGTTTTCTATACAATGGGACTAGGAATTAGAATCCTGCTCAATTCTCAGCTC  
CCTATTTGGCTAAGTTAAAAATTAATAACTAAATTTAATGTGATGAACTTTTGGGCATCAAA  
AGCCCCTATCTGAGAAGTTAGTCTCGGGTAATTGGCAGTGTGAGAAAGAGTTGGGAAGGGG  
AGGCAATGATCCAATGAATATAGAAAGAACTGGCCCGATTACAGGAAACTTTTACTTTGGA  
TAAGGTGGGTCAGCGTTGATGTGCAGGCAGGAAATTTCTTTGTACCAAATTAATAGCCCTGA  
CCCGGGGCATAGCCCAGAGTTCAGACCAGCCACCAAACAGAGTGAAACTCATCTCTACTTA  
AAAAAAAATAAATAAATAACTGTCTCTCTAGAGATAAAGCAAGGTCTGGATCAAACCAA  
CAACATAATAAAGTATATCGTTTTTATTTCCACATCATGAGTTGTTACCAAAGAGCACTCCCA  
GTAGCCCCTCATTTTTGAGACTCAACTGGCCAATACTTTTCAAGGTGGACCTAGGAGGAAC  
TGAAAAAAGAAAGAAATCCAGCGTTTCTTTTTGGCTCAGTGGGTGGGATTTGGAGGATATC  
CAGCAGAACTATAAGAAAGCAAAATGGAGGGTCCCATCCCCTTCAAGCCTGAGGTTTGA  
GAGTTTGTTCAGATTAGCTCAGTGAGATGCGAATTTCAAACAGTGGTGAGAATATGACA  
ACACTCCCGCAAATGTAGCCCTTCTTCTGTTTTGATAAGAGCAATAAGAATCTGAATGAAAT  
GGGACATCAGTTATTGAATTATCTTGCCTGGAAGTTACAGCAGATGCCTTCTAATACATGT  
GGCATGTCCCCCTTCTACAGCAGGTGATAACGGACTGAGACAGGGCTAAAGCCTGCCATCCC  
TTCTTATCCCAAAGCCTGTCAAGCATACTCAATCCGAACAGGACCACAGCTGCCCTGGTTCT  
TTCGCTCAGGGACTGGCTGGTGGCCTTGACTCTACTCATTCCAGAGGCTTAGCTGAAGATGT  
AGTCCTTACTTTAATCTCCATATTCTTGGCTTTTTCAGGTGAGCCATGTGCAGCTTCTCCAG  
AAATCTGGCATGCCTGTCCGGAGACGAGAATCGGGATAGCTTTGACATACAAATAACAGTA  
GACTCAAAATATTCGAAGACCTATTTCTTTGAAGTGGTAGAACTAGTTCTTCTTATAAGG  
AATCACACTTCTGACTAGCCTGTGAATAGAGCTGCCTCCCGGAATGTGTTCCCAAAGCATGG  
GTTGGCAGAACTCTGTATGTAAGAAAAAAGAAGAACCAGAAGAGAACGTTTTATTTCCC  
CATTAGGAGAGAAAACAAAATGCTCAACTGGGTTCCAGGCCACTGCATGCTGCCCTTACTTA  
CCACTGGAAACCATCCAAAATAACACAGTAGCGAGGAAACACCGTTTGGGGGATTGTCACTG

TATGTTGGTAAGTAGTCCATAAGCCATTCTGGAAAAGAAAAACAAAAATGAAGATCCTGAAT  
CACCAACCACAACCTCCACTATCCAGTACCATAGAATAACTAGTCTGATTCTGGAGCAGGGA  
GTGTCATTTTTCTTTTTACACCCTGTAGAAGAGTTAACTGAAAGGCCTGAGAGACTACTATC  
TATAGAAAGGTCTCCTTTGTCTTATTATGGCCAACTTAGCTCCCAGTCAACAGTTAGCTGAT  
ATGGGTGGCTCCTATTGCATGAACTATGCAAAACCTTTGATGGTTTATACTGAACCACAGGC  
TTTGCTTTGCAGGGTTTGGAATTCTGGTATGTGCTAAGCAGAGCGGAACAGTGACCAGCTCC  
CAATAAAAATTTTGGGTGGTGGGGCCAGGCATGGTGGCTCATGCCTACAATCCCAGCACTTT  
GGGGGAGGCCGAGGCAGGCGGATCACCTGAGGGTCAAAGTTCAGACAAACCTGGCCAACAT  
GGGTGAAACCCCATCTCTACCAAAATACAAAATTAACCGACCATACTGGCACACACCTGTA  
GTCCCAGCTACTCGGGAGGCTGAGGCACAAGAATTGCTTGAACCCGGGAGGCGGGGTTGCAG  
TGAGCCCAAGATCCCCAGCCACTGCATTCAGCCTGAAACAGAGGCGGACTCCGTCTCAAAAA  
ATAAATAAACATCATCATCGTGGGTGTTGGCTTAGTGTGAGGTGGCTCATGTACTATAATCC  
CAGCACTTTGGGAGCCAAAGGGCAGGCAGATTGCCCGAAAGGACCAGAGTTTGACCAAGCCT  
GGCCAACATGGTGAATCCTATCTGGTTAAAAATTATGTGTGGTGGTACTGCGCCTGTAATC  
CAGTGCCTTGGGAGTCTGAAACTGGGAGAATCGTTTGAACCGAGGAGCACAGAGGTTGCAGT  
GAGCTGGAATTGAGCCACTGTACTCCAGCCTGGGTGACAGACCAAAGACTTTTTTTTTTTTT  
TTTTTTTTTGGGAACAGAGTTTCGTTCTTGTTCCTTGGGATGGAGAACAATAGCACAATCTT  
TCGACTCACCACAGCCTGCCTCCTGAGTTCAAGTGATTCTGCCTCAGCCTCCCCCAGCCCGC  
TGAGTTTGAGCATGCACCACCATGCCAGCTAATTTTGTATTTTCGGTAACTGGGGCTTCTC  
CATCTTGGTCAGGCTGGTCTCGGACTCCGACCTCAGAGAGTGATCCACCCTGTGGCCTCCCC  
CAATGCCTGAGTTAGCGTGTGCCACTGCCAGCCAGACTCAGTCTTTAAAAACTTTGGGCCT  
TGGGTGTGGTGGCTCACGATCTGTAATCTCAGCACTTTGGGAGGCTGGTGATGGATCACCCA  
GGTCAGGGGTTTGAGACCACCCTGGCCAACATGGCAAAGCCCTGTCTCTACTGAAAATACAA  
AGAAAAAAAACCTAGCGGGTGTGGTGGCACACACCAGTAATCCCAGCTACTCGGGAGGCTGA  
GGCAAGAGAACTGCTTGAACCCGGGAGGCGGAGATTTGCAGTGAACCAAGATCACGCCATCG  
CACTCCAGCCTGGGCAACAAGAGAAGCGAAAACCTCATCTCAGAAAAACAAAACAAAACAAAC  
AAAGCAAAAAAACAAAAAAAACACTTGGGTGTTTTTTTTTTCTTGAGACAAAAGGAGT  
CTCACTCTCATTGCACAGTCCCTGGGTGCAGTGATGCAATCGACTCAGTACAAGCCCTCCAC  
CTCCTGGCTCAAACGGTCATCCCCACCTCAACCTCCTGTGTAGCAGGGACTACAGGCATGCA  
CTACCACCACAATAATTTTTTTTATTTTTTGCAGGGCTGGGTCTTCCCCTGTGTTGCCCAGG  
CTGATCTCCAAGCCTCCTTAGCTAAAAGAGATCACCTCCTGCCTCAGCCTCCCAAAGTGCTG  
GAGTGCAGGCATGACTACCGTGCTCAGCCAGGTGTTAAATTTCTAATGGCCTTCCTAAGCAG  
AAACATTGCACACATATTGCTACATTTCTGCTGGGAAGGGAAGCTTCACATCGGACTCCTCC  
AGACTCCTCTGTGCCTTTTTCTCTTGCCAGTCCAGCTGCATATCTTTACTCTGACACTGTCA  
TAAATCTTAACTGGGGGCACAGGCACGGTGGCTCATGCAATCCAAAAGCACTCAAGCCGGC  
GGGCGGATCACTTGGGGTCAGGGGTTTCGAGACCAGCCTGGCCAACACTATGGTGAAGCCTGT  
CTCTAATAAAAATACAAAATTTATGTAGGCAAGGTATGGTGCACATCTGTAGTCTCCTAGCC  
TGGGAAATAAACGGGAGAATTGGCAGACCTGTAGGTGGAGGTTGCAAGTGAGCTGCTATGG  
AGTCGCTCACTGCACTCCAGCCTACAACAGAGGCAGACTCATTCTCCCAAAAAAAAAAAAA  
AAAAATCAATATTTTGTGCCTAATGTACATCCTGAAGACAAAAAAGACCACAAAATTTTATT  
CTTCGTATTATTGGGTGATCTTGCTATTATTGTTATTCTGAGGCTGTGTATTTTAACCATTA  
AGTAGTTTAATATTTGGGGTTCCTGGGAATTAGGTTCTACAGTACAGGGAAAGACAAAAGAT  
AGAAGATAGAAATAAAAACTCCATAGTCCGAAATTTGAATTAAGGTGTTAAGTATATACT  
TAGGATTTATTTTATCTTAAAATAAACATACCAGTAAAATGTATTACTTGGTTCCCTTGTCT  
TCTGAAAAGGCCTACAAACAATAACGACCCAATAACTTAAGATATTCTTTCTAACACCCAAA  
TTGTGGTATTTATTTTTTATTTCACTAAAAGGAACAGGACTCCCTAAAAAATGTTAATTTCCA  
GGTGTAAAACTAAAAATATACAAGATGAACCTACAACATCTTGTAACACCAGAAAACAAGAC  
AGCTTCTGAGGTCATGTCAAGAACTTGAAGCAACAAGAAAACAATGACCAAAAACCTGGAATC  
AATTTATAATAACCTCTATGGATAATATATTTAAAAAACTAGAAAATTTATTGAATCTGTCT  
TTTTTTTTTTGACGGGAGTCTCACTGTATGCATCCACGCTGGGGTACAGCCACAGTCTTAAA  
CTCCTGCAACCTCTGCCTCGGGTTCAAGCCATTCTCTCACTTGCCTCAGCCTCCCAAGTGGC

TGGGATTACAGACACGATGCCACAATGCCTGGATAATTTTGGCACTTTTAGTAGAGGCAGGG  
TTTCACCATGTTTGGCCAGGCTGGTCTCAAAATCCTGACCTCAAGTTATCCACATGCCTCGG  
CCTCCCAAAGTGCTGGGATTACAGGCGTGAGCCACTCGCCTGGCTTTTTTATTTTTATTTTTT  
TTTGAAGAGGTCTCAGAACTGTTGCCAGGCTGGCATGCAGTGGCACAAACACGACTTAA  
ATGCAGCCTTGCCTCCTGGACTCAAGTGATTCTCCCAACCTCAGCTTCCCAAGCAGCTGGGA  
CTACAGGCACATATCACCATGCCTGGCTAATTTTTATTTTTGTAGAGACCGGGTCTCTCCCAT  
GCTGCCTGGCCCAGAGCTGTTTTTACAAATTTCTTGGGCTGGGCGCACAGTGACAATCCGCC  
TCTAATCCCAGCATTTTTGGGAGGCTGGGGTGGGAGGATTACTAGTCAGGAGTTTGAGACCA  
GCCTGCGCGCAGCATGGTGAGACTATACCACAAAAAATACAAAAATAGCCTGACATGTTCA  
AGCACCTGCGCCTAACATCCCAGCTCCTCGGGAGGCTGAGGCAGAAAATGCCTGTGAGCCAG  
GAAGAAGTCCAAGGCTGCAGTGAAATGATTGTGCCACTGCACACTAACCTGAGTAACAGTCA  
AGGGAGACCCTAATTTCAAAAAACCCAAAAATCCTTATTGAGATAAATACTGAAATATATA  
ATGAAAGACTGGGTTCTCCTACGGTAAAGCTAAATTTGCTTCAAAATAATCAGTGAAAGAAA  
TGGAAGGTATAGATAAAACAATTTTTGGCCATAAGTTGATAACTGGAGCTGAGGAGGATGG  
ATGGGGGTTTATTATACTCTTCTGCTTCTGTTACATCTTTTGTATCTATTTTCGTTACCATGA  
TAAAAACCCCTACCTTAAACAAAGTCTAATTCATTTGGCAAATCCAACTCAGCTACATGG  
TTTCGGAAATTTGCCCTCTGTACACAGTCTGGCAATTTATCACTTCTCCCCTAACCTCTACT  
TTCTCTCTAGCATATGGGTCTCTCCAGTGCATACCTGGCTCATTCCTATCTTTGTCTTTAC  
TTGAATCATGTCTTCTAACCCTAGTGTTCCCTACCTGCTCCTCTCTCTATCCAGTGTACTTTT  
TTTTTTTTGTTTTTACAAGGACCAACTCAAGTCCTTGAGGTGAGGTATAAATAAAACAACCTTA  
GTGAGAATAAAGAAAACACTACTAAAGAACACTGTCCCATATAGCCTAAATCGGGAACACAA  
GCAATGAGGAGAAACAAAGCCATTATAAGGTGAAGTGGAACATAAACCCAGCAGCCACTAGCA  
TCCCAATATCTATATACTAGTGGAATTTAGCTTAAAAGATAAAAAAATAAACACAAAAACAC  
CTCAGCTAGGCTGGGAAATAAATGAATTCATCTTTTCAAAGAAAGGTCACAGAATTTTAA  
AGCCCAGAATAGCATGGGTCCAATCTTCCCAAATGTAGGAAGCAGAAATCCAGAAAAGTTTC  
TATATCGGTGCTCTGCCACACAGGCCAAATGTTGACAGGAGGTGCTCGCTCTGGATTAAAG  
TCTGCTGATGCAGGCTAATCGTCAGTGGCTATGATTCTTTTAACTATCTCTCCAGATAGAAG  
AGGAACCAATGGATTACCTACTTTGTCCCTGGGGAACCTCCAGGTACATACCCTACGTCAG  
GAGTTCCCAAAAAATGGTTCCCAGACCAGTAGCATCAGACTCCCCGGCGAGAAGCTGTTCCCTG  
CATACCCCTCCTCTAGTTTCGTTATGATTATTATGAAAATTCTAGCCATGACATGTTATCTC  
TTGGATGAGGGTGAACCTCACCTCATCAAATGACTTGTGAGAGAATGGATAACCATTTGGGA  
TTCATGTAGTCTGACCCTGACAGACTGGAACCTCAGCACCTAGGATGCTCCACAGCACTGAAG  
GAGGAAAGGAGAAGCAAACCTCTTAGTAATGTCTATATATAAAACAACAGGAGAGCTAAGTTA  
AGGGAAGGCCATAAAGCTGGCTGATATATTTTATTACACAAAAACCACAAGGAGTCTACTAA  
GAGTAGATAAATACAACTAGGTTCTAAAAATGGCGAAGGCAGTAGTGGTGGCTCATGCCTG  
TAATCAACACTGGGAAGCCAGAAGGAAGATCACTTGAGGCCAGGGGGTCCAAAGACCAGCCT  
GGACCACACTGCTTGAAACCCCTGTGATACACAACAAAACAAATAGATCTATTAATAAATGAAA  
TGAGTTCTTGGTAATTCGGCTCACTAGGCTGTGGGTCAAACAACAGCACTTCTTTTTTTGAT  
TACCAACATTAATAATTATGGTTTAGCTAAAAGCTTGTATCTCTCCTTCTTCTAGACAGTCA  
GGTCCCTCATCTTCATGGATGGAAGGGGCGGCACTGGCTGCAGGGAAGCCTGTGGGGAGACT  
CATAGGACACCTGCAGAATATACAACTCAAGTGCGTAGGAATGAGGCCACAGCTAAAGAGA  
CTCGAGCAGCAGCACAAGGCAGCCATACATACCCGCGACACCAACACCATCATGTTGTTTTT  
CCTGATCCACACTATACCGCCGAACATAAACATAATCCATTGGTACATTGGATACTAAAGAA  
ATGGAGGGGCAGGATTAGTGTCTGCATCACACAAACCTGGACAGAAGAATAAATCAAGTAT  
AAAAATACTCACGGAAAATGGGTTACCCAAGTGAAGACACCGGAACCACTAACCCATCCCT  
CTCGATCACCTCAACTTGATTACCAGGCATCCCATTTTTTTCTATACTCTGTGTCCAGCTG  
CAGAAAGAGAAAAGACCATGAATACCCAAAGAAGACCCAAAACAAAAATGCAGAAAGCTTTC  
CAGATACTTTGGTCTCTGATCCAAGAAATCTTATTACAAGGAGAGTAATCTGGCCTAACAGA  
CAGTGCCAGGTGCAGAGACATGGCTGTGTTTACACAAGAATGAGCAACAAAATCACCTTATA  
CAGGCTAATGTCATTACACTGAATGTGAATCTTCATTAGACAAAACCAAGGAAAAGTCTTAA  
CAAAATATTTTAAATAGACACATCTGGGAAAATAATATATGAGTGATATGAATGTGTAAAGAT

GCAAAACAATTCCAAAAGTTTTAAACAACAAAAGTCCAAAATTATTAAGTAGACACTTCCA  
CAAAAATACCAAGCAGCATATTTTTTTTAAATTTCTGGCATCACTAGTAACCCGAAGATTTTC  
TCTTCTAAGACAGATATAACCATATACTATGGAAAAGCCAACAAAATTCTAAATAACAAGTCA  
GTACCTCTGGGGAAGGTACTGCGTTAGAGTGAGTGTTATAACCAGCGAAGTGATTCAGGAAG  
TCCAATAAAACAATGAAAAATCCAGAAAAGAAAGAAATTTTGTTCCTATAGAACTCTGGCGAT  
CCCACCTCCTGTTTCATTTTTTAAACCATCTTCCCCCTACAAGGAGGAAAGCAGTCTTTGA  
ACAGAATCTCTACATCTTTATGGAAATAAACATTAGGCCAACACAGTGACTCACCTGTAAT  
CCGGGCACTTTGGGAGGCAAGGCAGGAGGATCACTAGAGCCAGGAGTTCAGGAACCAGCCTA  
GGAGACATGGGAGACCCTGTCTCTAAGAAAAAAAATTTAATTAGCCAAGTGTGGTGGCGCA  
TGCCTGTAGGCCCTGGAAGCTGAGGTGGGAGGATCACTTGAGTCAGGAAACCAAAGGCTGCAG  
CAGGAACATGATCACACCACTGTACTCCAGCCTGGGTAGCTTGGCAGGTTGTCTCCAGGAGG  
GAAGAAAAAAGCCCTCCACTATGATGTTCTTGTGGGTAAACAGATGTATGTCATAATA  
TAATCCCTATCTGTACTGAAATTGGAAGAAAAATACTAAAGGTTTATTGGGTCAACTGATAA  
AACTGATAAATACAAACAGAGGACTACATGATGTTCCATCAGTGTTAAATTTACTAATTTCA  
ATAATGGTATCATGATTGGTTAAATACGGCATATGGCTAGTTTTAGGAAATACACACTGGAA  
GAATTTGGGGTAAAGGACTATGATGTATGTAAGCACCCCACTGCAGTTGTTTGGGGAAAAA  
ACAATAAAAGCCTCATAAAATACATTAAGTATTCATATCATTCTCTATCTGATATTCCCC  
AACGGTCCTGTGGGAGGTAGAAGCTGATCTCATCCCCATGGGACAGATAAAAAATTTCTAGGG  
TCCAAATGTTTACCTAAATGCATACAATGTGGTGTAAAGGTAGATAGATATGGATGTGCCAA  
GCTAATGTCACCTGAGTCAGATAAATGATTCATGTAGACAGTAACTAGTCAATGTGCTAGGA  
GGCTCCCAAATCTGGAGAAAAATTAACCTCACCTGAACATTGAAGAAGTCCCGAGGTGTCACAT  
CTGTGTAGGTTCCAAAACCTATAGGGAATGAAAGAAAGAATGAGGATGCTGGCATACTCCCG  
GTCACTGGCAGCCTGAATTTCTTTTACCTAGCGGCGTTCAGATCTAAAGTACTAAGAGTCTT  
AAAGGCAGGTTTCAGAACTAGAAGTCTTAGTGAAACAACAAAAGAAAGACAAAAGGGATGTA  
AGCAAAGACAACACTGAGACATTTGTCATCTGGAGAAGAAAAGCAATAAACAAAAAAACTAC  
GGCAAATTTTTCTGAAAACAACCAGAACAGTTTGAGAAATTATGAAGAACAATCCCATGCAC  
CTGATGCAAACTACTGGAACCCAAAAAGATAGCCACACTGGGCCTCACCTAGGTCTTTGGT  
AGGAGTGGATTTCTGTAATTGTTGTACAGCTTAAGTGTTTCTTATCCATCACCATTTCCCCA  
AGGTTGCTCTTGCCCTCTGAATCTTCATTCCCCTTCTGTTTGGGCTTTTGGTTCTGGAGGT  
GGGTGCTGGGACTCAAACCTCTTCTGACATTTCTTCCAACCTTCATCTCATTAATAGATCTGTA  
AGGGAAAAAGAAACCATGGATAGGGTGGTGCTTGAGTCAGCCCTGTGAAATGGGTGTCCACA  
CAAAGGTCTGTGCACGAAGGTATACAGTAAACCACAGTATGTGAGTATATAAACCCAGGAC  
ACAGTATAGTCAATAAAAAACTGAGTTCTGAGTTTGAATCTTAAAGGTCAACACTCACTAA  
CTGAATTATTATTTAACCAGTTCTATTTCTAAAATCTATAAAATGGAAATAATATAATAGTA  
CCTATCACAAGGGTTGGCTATAAGATTACAAAGAGTGTCAAGTGTGCAGGCGTGGTGGCTC  
ACGGCTGGCAATCTCAACACTGGGAGGCAGAGAGGGATTGGATCCATGGGGTCAGGGAGCTA  
AATGGCCTGTCCAACATGGGCAAACCCTGTCTCTACTACAAACACAAAAATTAACCGGGCAT  
GGGTGCGCGCAACTGTAATCCCAGCTACTCAGGGAGGCTGAGGCAGAGAATGACTTGAACCT  
GGGAGGCAGGGTTGCAGTAAGCCGAGATCACGCCACTGCACTCTAGCCTGGGCGACAGAGTG  
AGACTCTTGTCTCAAAAAAAAAAAAAACAAAAACAAAAACAACGAAAAAAAAAGTAAGTGTCCAAG  
TGCTTATATCTATGGCCAGGCACAGAGGCTCACTCCTGTAGTCCCAGCACTTTGGGAGGCCA  
AGGCAGGGGAGGAGGACTCCCCGCTTGAGGCCAGGTTCTGGGCTAACCTGGAAACCTGGTGA  
GACCCTACCTCTAAGAAAAATTTAAAAAATTAGCCAGGCATAATTGGCACATGCCTGTGCT  
CAAGCTATAGGCTGAGATGGGAACATCACCCAGGCCCAGGAGTTGGAGGCTGTAGTGAGCTA  
CAATCTGCCACTGTACTCCAGTCTGGAGCAATACAGTGAACCTCTGTCTCTTTTTTTTGTGTTG  
TTTTTTGAAACAAGGTCTCACTCTGTCCCCAAGCCTAGGAATAAGGGAGTGCCATGATCTGG  
GCTCACTGCAACTTCCATCTCACTGGGTTCAAGTATTTCTCCTACCTCAGCCTCTCCCAATG  
TGCTGGGACTACAGGCCACCTGCATCTCATGCCCGGCTGATTTTTTGTATTTTAGAAATGGG  
GTTTCACCGTGTGGAGACGGTCTCAATCTCCCTGACCTGCAGTCTGCCACTTCTCTCGGCC  
TCCCAAAGTTCTGGGATTACAGGGCGTAAACCACCGTGCCAGCTACACTGTCTCTTAAAAA  
TAAATAGGCTGGCGCAGTGGCTCACGCCTGTAATCCCAATACTTTGGGGGGGCTGAGGCAG





GTATCCTGCAAACCTTGATGACTCGTGTTATCTGACTCTAATTGCTTTCTTAGATTCCTTACT  
ATTTTCTAAATATAGATCATGTGCTGAGCTGCAAATGAGAGATAGTTTTATTCTTTCCCAATC  
TAAATGACTTTTCATTCCTTATGTTTTGCCCTGATTTTCGTTTGATTTATGACTTTCCAATTACA  
ATGTTAACCAAATGGTGCGAAACAGAATCTCACATCATTGTTCACAGTCTTGGGAGAAAAC  
TACTAAGTCTTTATATAACTACACTGTTAGCTATCAATTTTTGTAGATACCTTTTATCAGCT  
GCCGAGAAATTTCTTCAACCCAAGTCTGCTGAGTGTTTTCTTTTTATCCTAAAGAGGCTGG  
AATTTGTCAAGCATACTTTTTGTGTTTATTCAGATGATCCATAGTTTGTCCCTTTTTACAA  
TAATAGGTGCTTAATAAATTGATTTTTGTATGAAGAACCGCCTTACCGTTCCTTAAATAAAT  
CCTACTTTTTCTGCTTTTTCTCGTCAAAATTTCTCTTCACTGAAGTTCAGGTTTGTGAGTA  
TTTTGTTCAAGGACTGCAAAGTTTATTGTGGTTTTGTTTTGTTCTGAGCCAGGCTGGGGGT  
GCGAACAGCATAATCACAGCTCACTACTGCCTCTCCCAAACCTCAGGTGATTCTCCCACTTC  
AGCTTCCCAAGTAGCTGGGACACCGAACACACCATGCAACTAATTTGTTTTCTGTATTT  
TTGGTAGAGATGGGGTTTGCGCAATGTTGCCAGAGCTGGTGTGAACTCCCGCAAACCTCC  
ATTGATCCACTAGCCTGGGCCTCTTAAATTTCTTTGAGATTCCAAGCTGGGGACTCACCGGCT  
ACAAAAGTTTACTAAAACATAGAAAACCTACCCACCATATGTTGTACTATGTATCACTATAT  
GCTGTCATTCAGAAATTTATATACATATCTTATAAAAACATAGAATTATATGCAACAAGTGGG  
ATAATGGTGACATCTTGGAAAAATAAGAAGTATAACTGGAAAAAGGTACAGAGAACCCTAAG  
TATACTTGTAATATCTTATTTCTTAACATTAACTGTACGCTGTGGCAGCTACGTCATTTATT  
ATTTAACTGTGCTTTTTATATCTGAAACATTTTACAATGACAATTTTTTAACTTGGCTTGT  
ATTTTCCATAACCTCTTCTTTTGAATAAGGGTCACTATGGTAGCCGAAACTGACTCAAAT  
TACAAGACTGAGAGTCTCTTTCACCTCAGCCTCCCAAGTATAACAGTGCTATAACACCAGCT  
CTCCGTGCCCTCCACACTCACGCCCTACCCCTACCTTATTTAAAGAAAGGTTACAGATAAGA  
AACAAAATTTGCTGGCTGGCTGTCTTGCCACACTCTACATTCAGACTGAAGGGGGCCAAAT  
TACTGCTACACTGTCACAAATGCCTTTCACCTAACTTAAAAAACACAAAGGTAAGTACTGCTGA  
CAGAGTTAACCATACACACTGATTTTTATTCTTTACAGGCATATTACACTATAATTAATCT  
ATCTTTATATCTCTAACTCCTTACTATAAACATAGAATTCCTTAATAGCCCAAGAATCAGTC  
TTTTTCATATTTGTGGTTCAGCTCCTGTATGTCCGCGTGCAAGCATTACATGTCCTGGTAA  
ACGTACATACATTATGAATAAAATTTTGGTAAATCAAGAAATAATAAAATGAAAATGAGCCT  
CGTAATCGAATTTTTATTAATAAAGTTGCACGTAGTAAGGCCTGGGGCAGTGGTTCACGCCTG  
ATACTCAGCATTGGGAGGCTAAGGTGGGCAGATCACTTGAGCCCAGGACTTCAAGACCAGC  
CTGGGCAACATAAGAACTCCACCTCTAAAAAATAAATAAATAAATAAATAAATAAATAAATAA  
GCGTGGTGGCATGCAGCTGTAGTCCAGCTACTGAGGGAGAGCAGAGGTGGAGAATCACCTG  
AGCCCTGGAGTCGGGACTGTGGCGAGGCGAAATCATGCCACTGCCTCCAGCCTGTAACAGAG  
TGAAACTCAAAAAAATTTGGCCAGGTTAGCGGCTCACACCTGTAATCCCAGCACTACAAAA  
AAATTAGCGGGCATGGTGGCCTGCGCCTGTGATCAGCTACTCAGCAGGCTGGGGCACAAAGTC  
CTGTTGAAACCGGAGATGGGGTTGCAGTGAGTTGGTCTGCCACTGCACTCCAGCCTGGGTGA  
AATTGAACTGTCTCAAAAATATATATATATATTGCATTAATATATATTGCTGCAAAGCCAAAAAT  
TCAAAGGTATAGTGTCAATCCAAGTTAAAGTTTGAACCGAATTCAAATAAATGGGTAAGTC  
TAAGATTTGTGTTCTAGTCCCTGGCTCTACAATGACAGCTGTGTGATCTATTTTACCTATTTA  
AGTGAGGACGTTATTTCTTGAAGTCTAGTTTCTAAAATTGAATTTGCTGAATTTTTTAAGCT  
TTGGAAGTGGATGAAAGAAATAACATATAAGGGAATATTTGTCTTTTGGAGCTGCACAGAATC  
TTTCTATTTGGAAAGAACCCAAATAGGTGAATGCAGCCTCCCGCCACAAGCTTAGTTAAAG  
CACAGCTCTAGGTATTTAGTGAGACAAAGGAACCTCTAGAAGGGGCTTTGCATCTTGAAGAG  
AAATAACACAAAGGCACAAGGGGATCTTGAGGGAGCTGGGGTCCAGGTACAAGCCAATCTGG  
GGGAAAGAATGCAGCAACACTACTCTAAGTAGATTATTCTGCTGCAGGGTCTTGGTCAACCT  
GTTACCTGGCCTTGTCAATACTGAGTGACCTAATACCGTTTTTGATTAATTCCTTTTTTGGCT  
TAATTAGCAAGACCGTTTTCTTTGTTACAACCAAGAACCCTGACCAGCTGCAAAACCATGAA  
AGCAGAGGAACCTTAGGATAGGCATTTAGATGTTGCAGAAGAGAGCAAAAGCAAAACCGCAT  
AGCTAGATTTGCTCGAAGAACAATCAGGCGCAGACGCCGATTACAGTTTTGAGGTCTATAAA  
GCATCTTCAACAATAACTAAGCACAACTCTTAGGTGTCATTCTTTAAAAAATTTTTTTCTT  
CATTGCCCAAGCTGACCTCAAATTCCTGGGCTCAAGTGATCCTCAAAGCTCCCAAGTACAG



GCACATGCCACAACACCTGGCCAGTTATCATTCTTGCCACATAATAAGGGAGCATGTTTCCA  
CTGGTTGGAATGTCATTACTAAAACCTTGTCAGAGGCTCATAAAGTAATTACACTAGTTAATA  
AAGTTTTAAGAAAATTATTAGCTATAGGCAACATTTTTTCATGACCTTCTAGAATCAAGGTGG  
TTCAGGCATCTGACCCACTGCTTAAATCAAGCTCTCTATATAATTAAGGGTTACTAGGTGGC  
TTTGGCTAAAATTATGAAAAGGGAATGAAATGTCTTGTGGAGACACAGTATGAATGATAGAG  
CAAGACTGCTTCACGAAAATGCAATAAAGTAGTCAAGTTATTTTTTCCCAAGGTTTAGGAAT  
CTAAGAAGGGTCTGAACTTCTAAATGCTAACATGACAAGACCAATTAACATACAGGAGCACA  
AAGTCATTCACTAACATATATAACAGGAAAAGGGAAAAACCTCTCATGACACATCTCTTTAG  
GCTGCTGTACCCAATCTTGTGGATGGGATGGGTGGCTAAACCTTCATCTTAAGAGACTTA  
AGAGAGGACAGGGACAAAAGGAATTATTCCAAATGGTAAAAATCAGCAGATTGAAAGGAT  
CAAGAAAAGAGAGACCATGCCTTTCTTTCTCCAAAGCGAAGAAATCATTTTCAATATCTGAA  
AAAGGCTGGACCGGAAAGCTATAGAACTGAAAACAAACAAACCATGAAAACAAAGTAAGTG  
AAACAACATTTGGTTCATCTGGGGGTCCCTGCCCTCAGCATGAACTTGGTGTAAAGGCTCCAA  
AATTACTTAAATGGAAACCATCACTACAATTAGGAATTTTCAGTCCAGACAACAGCCTCACTT  
CCCTTACATAATCTCCTCTCTTCAAATTCAAGTTATTGTCAAGTCAGGTTCTACTGATACG  
GGACACACCTAGAAATAAAAGGTATAGAGGTCAGGCGCGGTGGCTTGTGCCTGTAATCCCAG  
CACTTTGGGGGAGGCCAAGGCAGGCGGATCACTTGAGATCAGGTTGGAGATCAGCCTGGCCA  
AGCACAGGTGAAACCTTCTCTTACAAAATAAACACACACACAAAATTAGGTGGGCGTGGTG  
GGGCATGCCTGTGTCCCAGCTACTTGAGAGGCTGAGGCAGGAGAACTGCCCGAAACCAGGAG  
GGTGGATGCTTACAGTAAGCCAGATCACACCGCTGCACTCCAGCCTAGGCAACAGAACAAGA  
CTCCGCCACCCCAAAGAAAGGAACCTTAAAACCAGGCGCTGGCTCTCAACACCCAAAGAGAG  
CCAGGCGTGAGGACTGTTTTGAGGTCAAGGAGCAGGAGTTCGAGACCAGCCTAGCCAACCAT  
GGGTGAATCCCGATCTCCACTAAAATAACAAAATTAAGCAGGCGTGGTGGCACCCCGCTGT  
AGACCCAGCCACTATGCTGAGCTGAGAGCCTGAGAAATAGCTGGAACCTACGGAGGCGGGGC  
TGCGGGTGAGGTGAGGAGATCACACCACTGCACTCCAGCCTGGCGAATGGAGAGAGAGAGGG  
GAGAGGTATGTGTAAGAAAAGGAGGTCTGGGCGTGATGTCTCACTGCCACTGCGTAATCCC  
AACTCTTTGGGAGGCCGAGACAGGCGGATCACGAGGTCAAGAGCTGGAGACCAGCCTGTCCA  
GCCAATACAAAGCGAAGAAAAA

**#Read from Family 5; III-37**

>276436a0-b04f-4edf-b4b5-bcd1baccb342  
runid=dc02366810d2b802a745c669295f0b5aa972cc39  
sampleid=LLAA044274 read=14872 ch=93 start\_time=2018-04-  
13T16:23:32Z

CAGTGTACTTCGTTACGTTACGTATTGCTACTAAGTGACCAGCTCCCAATAAAAAATTTTTGG  
GTGTTAAGAGCCAGGCATGGTGGCTCATGCCTAATCAGCACGCTTTTTGGGAGAGCCGAGG  
CAGGCGGATCACCTGAGGTCAAAGTTCAAGACAAACCTGGCCAACATGGTCAAACCCCATCT  
CTGCAAATACAAAATTAACCCGACCATACTGGCACACACCTGTAGTCCCAGCTACTCGGGA  
GGCTGAGGCACAAAATTGCTTGAACCGGCAGGTTGCAGTGTGGGCCAAGATCTAGCCACTG  
CATTCCAGCCTGAAACAGAGGCGAGACTCCGTCTCAAAAATAAATAAATAAATAAATAAATT  
GGTTGTTGGCTGGGCGTGGTGGCTCATGCCTTATAATCCCAGCACTTTGGGAGGGCCAAGGC  
AGGCCCCGGTGCCTTGAAGACAAGCCGAGACCAGCCTGGCCAACATGGTCAAATCCCATCT  
CTACTGAAAGTTAAAATTAGCTGGGCGTGGTGGTACACGCCTGTAATCCCAGTTACTTGAGT  
CTGAGGCAGGAAGATCGTTTGAACCCGGAGAGCAGAGGTTACACATGTTGGGATCCAGTTTC  
ACTGTACTCCAGCCTGGGTGACAGACCAAGACTTTTTTTTTTTTTTTTTTTTTTTTTTTTGGAG  
ACAGAGTTTTCGTTCCTTGTGCCAGGATGGAGGGTGGCAATCTCGGCTCACCTCCTCCTGGG  
ATTCAGTGATTCTGCCTCCCAGCCTTTGAGTTGAGCATGCCTATAATGCCAGCTAATTTTG  
TATTTTCAGTAGGGCTTCTCAGGCTGGTCTCGACTCCCGACCTCAAGTGATCCACCACCTTG  
GCCTCCCAAAGTGCTGGGATTACAAGCGTGCCACTGCACCCAGCCAAGACTCGTCTTTAAAA  
AGCACTTTGGAGCTGGGTGTGGTGGCTCACGTCTGTCTCACGCCACACACCTGGGCACCTGA  
ATCAGGAGTTCTCCACCCGCAACATGAATAAACCTGTCTCTACTGAAAATACAGCTTAGCC

AGGTGTGGTGGCACACACCAATAATCCCAGCTACTCGGGAGGCTGTGAGAGAACTGCTTGAA  
CCGGGAGGCGGAGATTGCAGTGTGGAGCCAAGATCACGCCATCGCACTCCAGCCTGGGCAAC  
AAAATGAAAACCTCATCTCAAGAAAAACAAAACAAAACAAAACAAAAAACAAAAAA  
ACTTACTTTGGTGTTTTTTTCTTACGAGACAAGTCTCACTCTGTTTACTGATCTGGAGTGCA  
GTGATCTCGACTCAGTACAGCCTCCACCTCCTGGGCTCAAGCAGTCATCCACCTCAACCTCC  
TGTGTAGCAGGGACTACAGGCATGCACTACCACCACAACCTAATTTTTTTTATTTTTTGCAGAG  
ACTGGGTCTTCCCTGTGTTGCAGGCTGATCTCAAACCTCCTTGTTAAAGAGATCCTCCTGCACT  
CAGCCTCCCAAAGTGTGCGATTACAGGCACATGAGCTACCGTGCTCCAGCCAAGGTGTTAA  
ATTTCTAATGGCCTTCCCTAAACAGAAACGTGCACACATATTGCTACACATTTTCACTGCTGG  
GAAGGCTTCACATGGACTCCTCCAGACTCCTCTGTGCCTTTTTCTCTTATGATCCAGCTGCAT  
ATCTTTACTCCTGAACACTGTCATAAATCTTAGCTGGGGCTGGGCACGGTGGCTCATGCCTG  
TAATCCCAGCACTCAACAACCGAGCGGGCGGATCACTGCAATCAGGAAGTTCGAGTGTGCA  
ACCCATGGTGAGAAACGTCTCCTAACAACACAAAAAATCAGGCGTGGTGGTGCACCGTGTA  
ATCCCAGCTACTTGGGGCTGAAGCAGGAAATTGCTTGAACCTGGCAGGAGATGGAGGTTACC  
TGGTGAGAAGCCAGATGCACCGCCAGCCTGCTGAAACGAGATCCGTCTCAAAAAAAAAAAAA  
AAAATCAATATTTTTGTGCACAGTATGCACATCCTGAAGACAAAGACCCTGGGAAATTTTAT  
TCTTCGTATTGGTGTACTTACTGTATTGTTGTTCTGAGCTGTGTATTCAACAAATTAGTAGT  
TGTGTTGGGGTTTCACAGAATGGATTCTATGAAACAGGAAAAACAAGGTATAAAGATAAGAA  
ATAAACTCCTGAATCTGAGTTTGAGTCAAAATATTAATATCATCTTAGGATTATTTTATCTT  
AAAAATAACCATAACCAATAAAATAACATGATACTTGGTCTGTCTTCTGAAAGACTACAAA  
CAATAATTGACTAATAGCTATGAATATTCTTAGCAGCCAAATTGTGTTATTTAAATGCCATT  
TTCCGCTCCCTAAAGAAATGTTAATTTAGGTGTAAAACCTAAAAATATACAAGATGAACCTA  
CAACATCTTGTAACACCAGAAAAGCAAGACAGCTTCTGGGGTCATCAAAGGAGCGAGCCAA  
CAAGAAAACCTCCAATGACCAAAACTGGAATCAATTTGAGCATCAATAGGATAATATATTTA  
AACTAAGTACATTTAAGTCTGTGTCTTTTTTTTTTTTTTTTTTTGAGACGAGTCTCACTGTGT  
CGCCACGCTAGGTACAGCTGACACGATCTTGGCTCACTGCAACCTCTGCCTCCACAGGTTT  
AGAAGCTGCATTCTCTCTCCTGCCTCAGCCTCCCAAGTGGCTGGGATTACAACACGTGCCAC  
AATGCCTGGATAATTTTGTACTTTAGTAGAGACAGGGTTTCACCATGTTGGCCAGGCTGGTC  
TCAAAATCCTGACCTCAAGTTATCTACATGCCTCGGCCTCCCAAAGTGTGGGATTACAGAG  
CGTGAGCCACTGCGCCTGGCTTTTTTGTTTTTTATTTTTTTTTTTGAAGGGGTCTCAAACCTGTTGC  
CCAGGCTGGCACATGCAGTGGCACAAACACGGCTTAATGCAGCCTTGACCTCCTGGACTCAA  
GTGATTCTCCCAACCTCAGCTTCCCAAGCAGCTGGGACTACAGGCACATATCACCATGCCTG  
GCTAATTTTTTTATTTTTGTAGAGACAGGTCTCTCCGCTGCCTGGCCCAGAGCTTTGTTTTAC  
AGGTGTTCTTACTTGGGCTGGGCACAGTGTGGCTCACGCCTCCTAATCCAGCCTTTTTTGGGA  
GGCTGAGGTGGGAGGATGCTGAGTACAGACTGGGCTCAGCCTGCGCAGCATAGTTGAGACC  
CCATCTCTACAAAAAATACAAAAAATTAGCCTGACATGTTGGCTTCTGCATACAATCCCA  
GCTCCTCAGGAGGCTGAGGCAGGAGGATCACCTGAGCCCAGGGGAGAGAGTCAAGGCTGCA  
GTGAGTTGTGATTGTACCACTGCACACCGCCTGGAATGGCACAGTGGGAGGCCTGTTTCCAA  
AAAAACCCAAAATCCTTATTTGAGATAAATAACTGAAATATATAATAGAAGAACTGGGTCT  
CCTACAGTAAAGCTAGAATTTGTAAAATAATCGGGGAGTGAAAGGGAATGGGAAAGGGGTAT  
AGATAAAACAATTTTTGGCCATAAGTTGATAACTGGAGCTGGGGATGGATACAGGGGTTTATT  
ATACTCTTCTACTTCTGTATCTTTGTATCTATTTCAAATTTTCCATGATAAAACCCCTACC  
TTGGCTCAAGATCTAATTTCCCATTTGTGGAAATCAAACCTCAGCTACATGGTTTTAGTGCCCT  
CTGTACACAGTCAATGCAATTTATCCTTCTCCTAACCTCTACTCCTCTCTAAGCATGAGTCT  
CTCAGTGCATGCCTGTCATTCCTATCTTTGTCTTTGCTTGAATCATGTCTTCTAACCTAGT  
GCCCTGCCTGCTCTCTATCAATTGTACTTTTTTTGTTTTTTTTTACAAGGACCAACTCAAGT  
CCTTGAGGTGGTATAAATAAAACAACCTTGATGAAAGAAAACACTAAAGAACACTGTCCA  
TATAGCCTAAATCGAACACAAAAACAGCCAGGGAGAAACAAAGCCAAATTATAAGGTGAAG  
TGGAACATAAACAGCAACCCTAGCATATCTATATACTTTCTCAGTGGAGATTTAGCTTAA  
AAAGATAAAAAATAAACACAAAACACCTCATTGGGCTGAAATAAATATTCTTTTCAAGAAAGG  
TCACAGAATTAAGAAGGCAGACAGCATGATCCAATCTTCCGTACTCTGGCAAGGAAGCAGA

AATCAGCTTCCATCCAGTGCTCTGCCACTGTAGTAAAATGTTGACAGAAGTACTCGCTCTAG  
TTCCTGAAGAATGCTACTGATACAGGCTAATGCGTCAGTGGCTATGATTCTTTAACTATCTC  
TCAGATAAGAGGGAACCAATGGATTCATACTACTTTGTCTTGAGGAACTTCAGGTACATCA  
CCTCGATCAGGAGTTTAAAAAATGGTTCACAGACCAGTAGCATCAGATATTTGGCGAGA  
GTTTCTGCGCCACCCCTCCTCCTAGTTCAGGTAAGACATCCTTGAGAAAAATTCACAGCCA  
TGACATGTTATCTCTTGGATGAGGTAAAACCTCACCTCATCAAATGACTTGTGGGACGGATGT  
ATTGGGATTTCATATGATCTGACCTAATTCTGGGAGACTCTGGCACTCGGTGATGCTCCACAAC  
ATAGTAGGAGAAGAAGCAAACCTCTTAGTAATGTCTATATAAAACAACAGGAGAGCTAAGTTA  
AGGGAGGCCTAAAAAGCTGGCTCTGATATTTTTCAATGCACAAAAACAAGGGAGTCACTAA  
GATGAATAAATACAACTAAGTTCTAAAAATGAAGCCGAAGGCCAGACGTGGTGGCTCATGC  
CTGTAATCCCAACACTACAGGAGAGCCAAGGAAGGAAGATCACTTGAGGCCAGGAGTCAAGA  
CCAGCCTGGACCACTGTCAAAAACCTTAGTTACAATAAACAAATGAATTAATTAATAAATGAA  
GTGAGTTCCTTTGGTAATTTACGGCTCACTAGGCTGTGGGTCAAAAACAACAGCACTTCTTTT  
GATTACCAACATTAATAATTAATAAAAAACAGTTTTAACTAAGCTTGTATCTCTCCATTCTTTC  
TAGACAGTCAAGTCCCTCATCTTTAGCTGGATGGAAGGGGGCACTGGCTGCAAGGGAAAAGC  
CTGTGGGAGACTCATGAGACACTAGAATATGTACAACTCAGTGCACGTAGGAGAATGAAGG  
CCACAGCTAAAGGAACTGAGCAGCAGCCACGGGCAGCCATACATACCCGCTGACACCAACAC  
CATCATGTTGTTTTCTGATCCACACTATAACGCCGAACATAAACATAATCCGTGAGTACA  
TTGGATACTAAAGAAATGGAGGGCAGGATTAGTGTTCTGCATCACACAAACCTGGACAGAAA  
TAAAATCAGAAGTAAAAATACTCACAGAAAATGGAATTACCCAGTGAAGAACCTCGGAACCA  
CTAACCACATCCCTCTCTCTCGATCACCTCCAGCTTGATTACCAGGGCATCCCATTTTTTTC  
TATACTCTGTGTCCAGCTGCAAACCTATAGATACAAAGACAAGCTCATCTGAAAAGCTTTCAG  
ATACTTTGGTCTCTCTGATCAAATCTTATTACAAGGAAAGTAATCTGACCTAACAGACTAGT  
GCCAGGAGTGAGACATGGCTAAGTATTTTACTACAGATGACAACAAAATCACCTTATACAGG  
CTGTGTCAATTACACTGAATGTGAGATCTTCATTAGACAAACCAAGGAAAGATGTAACAAAAT  
ATTTTAATAGACACATCTGGGGAAAATAATATATGGTGATATGAATGTGTAAGAGATAAGAC  
AATTCTAAAGTTTTAAACAACAAGGATCAAAAGTGTTAAGTAGACCTTCACACCTAAAAAT  
GCAAGCAAAACATATTTTTTTAAGGCTACCGAAAATCACTGGTGGCTGAAGATTACTCAACA  
AGACAGATATAACATATCTCTGGCTCCAACAAAGTCATTCCCTAAATTAACAAGATCAGTA  
CCTCAGGAGAGGATTGCACCTTGCGATTAGTGGGTGATAATAGCGAAAGTGGTTAGCGGAGTC  
AATAAAAAACAATGAATCAGAAAAAATTTGTTCTAGAATCTGGGCGATCCCACCTCCCTG  
TTTCATTTTTTCGCTCCATCTTCCCTAAGGAGGAAGCAGTCTTTGAACAGATACTCTTCATCTT  
TATGAAATAAACATTAGACCAGCCTGAGTGACTCACACCTGTAATCAGCACTGGGAGAACAA  
AAACAGGAGAGGATCACTAGAGGCCAGGGTTCAAGACCAGCCCTGGGAGACATAGGAGAC  
CCTGTCTCTAAGAAAAAAAAAAAAAAAAATTTTAATTAATAGGGTGTGGTGGCGCATGCCTGTGT  
AGGCTGCGCGAGGTGGGATGGTCAGGAAACAAGGCTGCAGCAAGACATGATCACACCACTG  
TACTCCAGCCTGGGTAACACAGCGGGACCCTGTCTCAGGGAGAGGAAAAAAAAAAAAACCCCTCC  
ACTATGAAATATTTCTTGATTGAGGGTTAAACAGATGTGACAATAAATAATCTATCTGT  
ACTGAAGTGGAAAATGCTATAAGGAGGCTTGATGAGTCAACTGATAAACTGATAAATACAA  
ACAGAGGACTACATGAAAGTGTTCCATCGGTGTTAAATTTACTAATTCAATAATCGTGATTA  
GTTAAGAAATACGGCCATATAGCTAGTTTTTAGGAAATACACACTGGAAGAATTTGGGAGTAA  
GGACTATGATGTATGTAACCTACTCTTAAGTTGTTTAAAAAGCAATAAAGCCCTCATAAAA  
TACATTAAGTATTCATATCCATTCTCTATCTGATATCCCAACAGTCTGTGGGAGGTAA  
AACGATCTCTCATCCCATGGGACAGATAAAGAAATTTAAGTCAATGTTTACCTAAATGCT  
ATGCAATGTGGATGACAGGTAGATAGATGGATACTTAAGCCAATGTCACCTGAGTCAGATAA  
ATGATTCGTAGACAGTAGCAATTGATATGCTGGAGGCTCCAATCTGGAGAAAAAATTAAC  
TCACCTGAACATTGAAGAACTGCCGAGGTGTCACATCTTGTGTAGGTTCCAAAACTAAGAA  
TGAAAGAAAGAAATAAGGAGATGCTGGCCCCCTTATAGTGTACAAATCTTTCGCTGTTTCT  
TTCACCTAGCGCGTTCAGATCCTAAAGTACTTTAAGAGATCTTAAAGGCAGGTTTCAGAAAC  
TTAAGTCTTAGTAGAGCAACAAGAAAAGGTAAAGAGGATGTAAGCAAAGACAACACTGAGA  
CATTTGTCATCTGGGAGAAGAAAAACAATAAACAAACTACGGCAAATTTTCTGAAAGTA

GAACAGTTTAGAGAAGTATGAAGAACAGAAATCCCCATGCACCTGTGCAACTATGGAACAAA  
AGATAGCCACACTAGGCTCACCTCGGTGCAGTAAAGGTGGGTGCCTGTAGTGAGCCGCCACA  
GCTTAAAGTGTCTTTCTTATCCATCACCATTTCCCAAGGTTGCTCTTTGCCCTCTGAATCTTC  
ATTCCTTCTGTTTGGGCTTTTGGTTCTGGAGAGTGGTGGACTCAGAGCTCTGAAACATATT  
TGACATTTACCAACCGCTTCATCTCATTAATAGATCTGTAAAAGGGAAAAAGAGCCATGGT  
GAGAGGTGGTTAGTCAGCCCTGTGAAATGAAGTGTCCACACAAGGTCTGTGCAAGAAGGTTA  
TACAGTAAACCACAGTATGTAGTATAAACAGGACACAATATAGTCAATAAAAACTGAGTTCC  
TGAGTTTGAGATCTTAGTCCAACACTCACTAAGTATTATTATTTAACAGTTTCTATTTTC  
TAAATCTATAAAATGGAATAATAATGGTACCTATCTCGAGGTTGGCTATAAAGATTACAAA  
GTGTCAAGTGTGTCAGGGGCGTGGTGGCTCACGACTGTAATCTCAGCACTGGGGAGAGCAGA  
AAGGGTGGATCCTCAGGAAAGCTCAAACCAGCCTGATCAACATGGTGAACCCCTGTCTCTA  
CTACAAACACAAAAGTGTAAACCGGCATGAGGTGAGCGGCGCAACTGTAATCCAGCTAC  
TCAGGAGGCCCGAGGCAGAATGACTTGAACCTGGGAGGCGGGGTTCGCTCAAGCCGAGATCA  
CGCCACTGCACCTCTAGCCTGGGCGACAGAATTGAACTCTTGTCTCAAAAAAAAAACAAAAA  
CAAACAACGAAAAAAGTAGGGTGTGAGGAGTCTTAATATATCTATGGCCAGGCCTGAGGCT  
CACTCCTGTAGTCCCAGCACTTTGGGAGGCCAAGGCTCGGGAGGAGGACTTTCCCTTGAGGC  
CAGGTTCAAGATAACCTGGAACACAGTCGAGACCCTACCTCTAAGAAAAATTTAAAAAATT  
AGCCAGACATAGTGGCACATGCCTGTACTCAAGCTATAGGCTGAGATGGGAACATCACTTGA  
GCCCAGGAGTTGGAGGCTGTAGTGAGCTACAATTCTGCCACTGTACTCAGTCACAGGCAATA  
CAGTAAGACTCTGTCTCTTTTTTTGTTTTTTGAAACAGAGTCTCACTCTGTCACCCAAG  
GCTAGAATAGAGTGCCATGATCTGGGCTCACTGCAGCTACGCCTCCTGGGTTCAAGTATTTT  
TCCTGCCTCAGCCTCCCAGTAGCTGGAGACTACAGGCCGCAGCTATCATGCCCGGCTGATTT  
TTGTATTTAGCAGAGACAGGGTTTTACCGTGTACCCAGGGCGGTCTCAATCTCCTGACCTC  
ATGATCTGCCCGCCTCGGCCTCCAAAGTTCTGGGATTACAGGCGTAAACCACCGATGCCAG  
CTACACTGTCTCTTAAAAAATAAAATAGGCTAGGCGCAGTGGCTCACGCCTGTGAATCCTAA  
TACTGGAGGCTTTGGGCTGGCAATCACCTGAGGTGTGAGGTTTGGCAGCTAGCTGCGTGGA  
GAAACCTGTCTCTGCTAAAAATACCAAATTAAGTGAACACTGGTGGCTTATACCCATATAA  
TCCCAGCTGCCTCAGTGAGACAAAGTAACAGGCTGAAGGCAGTACAAGGGACATTATAGCAC  
AGACCAACAAGCGAAAACTCCGTCTCAAATGAAATGAAATGAAATGAAATGAAATGAAATGA  
AATAAATGAAATAAATGGTAAAGAAATGAAATAAATGAAATATAAGAAATGAAATAAAAAATG  
AAAATGAAATAAATGAAAATGAAATGAAATGAAATAAATGAAGTAAAGAAATGAAATGTGAAA  
TGAAATGAAATGAAATGAAATGAAATATGAAATGAAATGAAATGAAATGAAAGAAATGAAGT  
AAATGAAATAAATGAAATAAAAAATGAAATAAAGAAATAAAGAAATGAAATAAATGAAAATGA  
AAATGAAATAGTAAATGAAAATAAGAAATGAAATGAAATGAAATGAAATGAAATGAAATGAAATGAA  
ATGAAAATAAGAAATGAAATGAAATGAAATGAAATGAAATGAAATGAAATGAGAAATAAAGA  
AATGAAATAAATGAAAGTAAATGAAATGAGAAATAGAGAAAGAAATGAAAATGAAAGTAAAGA  
AATGAAATGAGAAATGAAATGAAATATGAAATGAAAATGAAATGAAATAAATGAAATGAAAT  
GAAATGAAATGAATGAAATGAAAGTAATGAAAGTAAATGAAATGAAATGAAATGAAATGAAG  
AAATAAATAAAGAAATAAAGAAATGAAAATGAAATGAAATAAGAAATGAAATAAGTAAAAAT  
AAATAAGAGAAATAAGAAATAAATAAATAAATGAAGTAAATGAAAATGAAAGAAATGA  
AGTAAATGAAATGAAATGAAATGAAATGAAATGAAATGAAATGAAAATGAAGTAAATGAAAT  
GAAATGAAGTAAATGAAATGAAATGAGAAATGAGAAATGAAATGAAATGAAATGAAATGAAATGAA  
TGAGAAATGAAATGAAAATGAAATGAAATGAAGTAAATGAAATGAAATGAAATGAAATGAAATGAA  
TGAAATGAAATGAGAAATAAAGAAATATGAAATGAAAGTAAAGAAATAAGAAATGAAATGA  
AATGAAATGAAAGTAAATAAATAATAGAGAAATAAAAAATAAAGAAATGAAATAAAGAAATGAA  
ATAAAGTGAATGAAATAAATGAAATGAAATGAAATGAAATGAAATGAAATGAAATGAAATGAAATG  
AAATATGAAATGAAATGAAATGAAATGAAATAAATAAATGAAATGAAATAAAAAATAAGAAAT  
GAAATGAAATGAAATGAAATAAAGAAATGAAGTAAATGAAATGAAATGAAATGAAATGAAATGAA  
TGAAATAAATAATCAAAGCATGAAATGAAATGAAATGAAATGAAATGAAATGAAATGAAATGAAATA  
ATGAAATGAAATGAAATGAAATGAAATGAAATGAAATGAAATGAAATGAAATGAAATGAAATGAA  
TGAAATGAAATGAAATGAAATGAAATGAGAAATGAAATGAAATGAAATGAGAAATGAAATGA





TCTGTATTTTTAATGTTGGAGATGCGGTGCACCATGTTGCCCAGGCTGGTGAACCTCTGGCCT  
CCAAGTGATCCACTAGCCTGGGCCTCCCAAAGTGCTGGGATTCAGGCGGGACTCACACAGGC  
TGCAAAGTTTAAAACATGAAAAACACCACCATATATTGTACTATGTATCACTATGCTCATTC  
AGGGAGTAGCATATACATATGTATAAAAACATAAGGAATTATATAACAACAAATTGGGATAAT  
GGTGACATCTTGGGAAAAATAAGAATACAACCTGGAAAAGGTACAGAGGAACCCTAAGTATAC  
TTGTAATATCTTATTTGTAACATAGCTGTACTTACTGTAGCTAAGTGTTATTATTTAAACCT  
TTTTTTATATATCTGAAGCATTTATAATAATAATTTTTTAAACCTTGGCTTGTATTTTTTCCAT  
AACCTCTTCTTTTTGAGACAAAGTCTCACTATGTCTGTGAAAACCTTGGCCTCAAATTCCTGG  
GCAAGAGATCCTTTCACCTCAGCCTCCCAAGTAGCTGGCACAATAGGCGTGTGCTACCATAC  
CCAGCTTCTCCGTGCCCTCCACCTCACCTACCCCTGCAACATTTAAAGAAAGGTTACAGAT  
AAGAAACAAAGTGCTGGCTGGCTGTCTTATACACTCTATTGCAATTCAGACTGAGAGAAGA  
CCCAAATTAAGTACTGCTACACTGTCTGAAATGCCTTTTACCCTTCAAGCTTCAAAAACCACAAA  
GGTAACTGCTAGGCCGGGATTAACCATACACACTGATTTTTATTCTTTACACAGGCATATT  
ACACTATAATTAATCTATCTTTATATCTGCTTTCCTTACTAAACTATAAATTCCTTAATAAG  
CCAGAATCAGTCTTTTTTCATATTTGTAGTTCAGCTCCTAACATGTCTGGTAAGCTTGAACA  
TGTCTTGGTAAACATTACATAACCACATTACATGAATAAATTTAGTAAATCAAGAAATAAAAT  
GAAAATAGGCCTCAGTAATCAGAAATTTTTATTAAAAAGATTGCACGTAAGGCCTGGGGCAG  
TCGGTTCACGCCTATAATCCTCAACATTACGGGAGGCTGGAGTGGAACGAATCCCACTTGA  
GAACCCAGGACTTCAGACCAGCCTGGGCAACATCTCTAAAAAAAACATTACACAACAAATA  
GCTGAGCACAGTGGCAATACAGCTGTAGTCCAGCCCCTACTGAGGAGAGGGTGGGAGAATCA  
CCTGAGCCCTGGAGGTGCGGACTGCATGGCGAGCCAAAATCATGCCACTGCACTCCAGCCTG  
GCAACAAGAGTAAGACTCTTAAAAAAAATAAATTGACCCGGGTGCAACGGCTCACACCTGT  
AATCCCAGCACTACAAAATAGCCAGGCATGAGGTGGCCTGCGCCTGTAATCAGCTACTCAG  
CAGGCTGAGGCACAAATCTGTTGAACCCAGGAGATGGAGGTTACAGTGAAGAGTTGAGATCG  
TGCCTCCAGCCTGGGTGAGAATAGCTGTCTCAAAAATATATATATATTGCATTAATACTA  
TATTGCTGCAAAAAGCCAAAATTCAAAGGTATAGTGTCAATCAAGATTAAGTTTAGAGCA  
ATTAAAAATAATGGTAAAGTCTAAAGATTTGTGTTCTAGTCCTGGCTCTACAGCTGACCAGC  
TGTGTGATCTTATTTTTATTTTTACCTTTAAAGTGAGGACGTTATTTCTTGAAGTCCTAGTT  
CTAAAATTCAGATTTGCTTTGAATTTTAAGCTTTGGACTTGGATAAAAAATATTTATATAAG  
AATATTTGTCAATTTTACTGCCTAATCCTTTCTATTTGGAAGAACCCTAATAGGTGAATGCA  
GCCCCTCTCCGCCCAAGCAGTTAAAGCACGGCTCTAATTTAAGTGAGGTTAGAGACTTCT  
AGGGGCTTTGCATCTTGAAAGATGAGCACAGGATCTTGAGGGAGCTGGGAGGAGTCCAGGAG  
TACAACCAATCTGGGGAAAGAATGCCAGCACTGCTCTAAGTAGATTATTCCTGCTGCAGGTC  
TTGGTCAGCAACGCTGTCAATACTGGTGACCCTAATACCGTTTTGATTAATTCCTTTTTTGA  
ATTAACCAAGACAGTTTCTTTAATTTGCAGCCAAGAACCCTGACCAGCTGCAAAACCATAGA  
AACAGAGAAGGAGCCTTAGGATAGGCATTTAGATGCAGAAGAGAGCAAGCAAGCCATAGC  
TAGATTTGCTCGAAGACAATCGGAAGCATATAGGGCATCGATTACAGCATTTTTGAGGTC  
TAAAGCATCCTTCAACAATAACTAAGCACAACTCTTGAGAGTGTCAATCTTTAAAAAATTTT  
TCTTCATTGCCAAGCTGGCCTCAAATCTGGGCTCAAGTGATCCTCCAGCCTCCCAAGTAG  
GCACATGCCTGCAACACCTGGCCGAATTATCATTCTTGCCACACTTAATAAAAGGGAGCATG  
TTTCCACTGGTGGAATGTCGTACTAAACATCGAGGCTCATAAAATAATTACATGGTTAATAA  
GAAGTTTTTAAAAATTATTAACATAGGCAACATTTTTTCATGACCTTCTAAGAATCCAAGGT  
GGTTCAGAGCATCTAGCAATACGTAACCT
