# Supplementary material for: Intronic ATTTC repeat expansions in STARD7 in familial adult myoclonic epilepsy linked to chromosome 2
Source: PubMed Central journal article supplement (PMC6820779; doi:10.1038/s41467-019-12671-y), 2019-10-29
Supplement: 41467_2019_12671_MOESM5_ESM.pdf [file 41467_2019_12671_MOESM5_ESM.pdf]

**Title: Supplementary Data 1**

**Description:** Contains Supplementary Data 1: Combined summary of RP-PCR results from all families.

**Title: Supplementary Data 2**

**Description:** Contains all long read sequences that span the ATTTC repeats in fasta format.
